1 Sexual segregation in a highly pagophilic and sexually dimorphic  
2 marine predator

3

4

5 Christophe Barbraud<sup>1</sup>, Karine Delord<sup>1</sup>, Akiko Kato<sup>1</sup>, Paco Bustamante<sup>2</sup>, Yves Cherel<sup>1</sup>

6

7

8 <sup>1</sup> *Centre d'Etudes Biologiques de Chizé, UMR 7372 du CNRS-Université de La Rochelle,*  
9 *79360 Villiers-en-Bois, France*

10 <sup>2</sup> *Littoral Environnement et Sociétés (LIENSs), UMR 7266, CNRS-Université de La Rochelle,*  
11 *2 rue Olympe de Gouges, 17000 La Rochelle, France*

12

13

14

15

16

17

18

19

20

21

22

23

24

25

26 **Abstract :** Sexual segregation is common in many species and has been attributed to intra-  
27 specific competition, sex-specific differences in foraging efficiency or in activity budgets and  
28 habitat choice. However, very few studies have simultaneously quantified sex-specific  
29 foraging strategies, at sea distribution, habitat use, and trophic ecology. Moreover, these  
30 studies come from low latitude areas reflecting a lack of evidence for polar species. We  
31 investigated sexual segregation in snow petrels *Pagodroma nivea* and combined movement,  
32 foraging trip efficiency, stable isotope and oceanographic data to test whether sexual  
33 segregation results from sex-specific habitat use. Breeding birds foraging in the Dumont  
34 d'Urville sea, Antarctica, were tracked during incubation. Some similarities between males  
35 and females foraging characteristics did not support the sexual segregation hypothesis.  
36 Indeed, space-use sharing and utilization distribution,  $\delta^{13}\text{C}$  values and foraging trip  
37 performances (trip duration, length, speed and directions, mass gain, proportion mass gain)  
38 were similar between males and females.. However, there was support for sexual segregation  
39 in foraging characteristics linked to foraging habitats. Females foraged less than males in  
40 areas with higher sea ice concentration (SIC >70%) and had lower  $\delta^{15}\text{N}$  values in plasma,  
41 blood cells and feathers. Foraging efficiency (proportionate daily mass gain while foraging),  
42 was greater for females than for males, and was greater for larger females with deeper bills.  
43 Females were more efficient than males during short (<2 days) foraging trips, and for females,  
44 but not for males, mass gain, proportion mass gain and body condition at return from a  
45 foraging trip were positively correlated to SIC of the foraging areas. Together, these results  
46 suggest an absence of sexual segregation at large spatial scales in snow petrels during  
47 incubation, but strongly support habitat segregation between high (>70%) more profitable SIC  
48 (males) and low SIC areas (females), probably driven by intra-specific competition.  
49 Therefore, male and female snow petrels segregate at small spatial scales mainly determined  
50 by habitat (SIC) characteristics.

51

52 **Keywords :** bio-logging, competition, foraging, isotopic niche, *Pagodroma nivea*, sea ice  
53 concentration, snow petrel

54

## 55 **1 Introduction**

56 Sexual segregation occurs in a many living animals including invertebrates (Hochkirch et al.  
57 2007, Romey & Wallace 2007) and vertebrates (Ruckstuhl & Neuhaus 2005, Wearmouth &  
58 Sims 2008) but also in plants (Harder et al. 2000). Investigating sexual segregation is of  
59 particular relevance from a fundamental point of view to understand how and why the sexes  
60 differentially distribute themselves and the consequences on population processes and  
61 dynamics. It is also relevant from a management and conservation point of view since sex  
62 specific distribution influences overlap with spatial distribution of human activities and/or  
63 contamination gradient (Carravieri et al. 2014). Two main concepts have been proposed to  
64 describe sexual segregation: social segregation, where males and females tend to form single-  
65 sex groups within the same or homogeneous habitat; and habitat segregation, where males and  
66 females use different habitats within a home range and with habitats differing in their amount  
67 or quality of forage distributed heterogeneously or patchily (Conradt 2005, Ruckstuhl 2007).  
68 Both social segregation and habitat segregation can or cannot lead to spatial or temporal  
69 segregation, which have been be considered as auxiliary concepts (Conradt 2005, Ruckstuhl  
70 2007). However, the distinction between habitat segregation and spatial segregation is scale-  
71 dependent: spatial segregation is a mechanism to avoid competing for the same habitat by  
72 choosing different locations, while habitat segregation is a mechanism to avoid competing for  
73 resources at the same location. These concepts can also be understood in the framework of  
74 equalizing and stabilizing mechanisms applied to movement ecology (Chesson 2000, Jeltsch  
75 et al. 2013).

76           Several hypotheses have been proposed to explain social and habitat segregations  
77 (Conradt 2005, Ruckstuhl 2007, Wearmouth & Sims 2008). In solitary animals, social  
78 segregation is unlikely to occur since by definition a single animal is not social (Conradt  
79 1998, Neuhaus & Ruckstuhl 2004), except perhaps in rare cases (Martin & Da Silva 2004).  
80 Four main hypotheses explain habitat segregation in solitary species (Ruckstuhl 2007,  
81 Wearmouth & Sims 2008). The forage-selection hypothesis, which incorporates the scramble  
82 competition hypothesis, suggests sex differences in nutritional requirements linked to sex-  
83 specific differences in body size (Gross 1998). The larger sex individuals select habitats  
84 where intake rates are high whereas the smaller sex individuals are constrained to sites where  
85 they can obtain a high-quality food (Beier 1987, Barboza & Bowyer 2000). Alternatively, one  
86 sex may forage more efficiently, thus outcompeting and excluding the other (scramble-  
87 competition hypothesis or intersexual competition hypothesis) (Clutton & Brock et al. 1987).  
88 The activity-budget hypothesis, initially developed for group-living species, was extended to  
89 solitary species and to species with unequal reproductive investment (Wearmouth & Sims  
90 2008). This hypothesis proposes that sex differences in activity budgets will increase with  
91 divergence in the body size of the sexes. Therefore, the sex-specific energy requirements will  
92 result in sex-specific habitat used due to allometric relationships between body size and  
93 metabolic rate. Finally, the predation-risk hypothesis proposes sexual differences in risk of  
94 predation and in reproductive strategies (Main et al. 1996), and the thermal niche-fecundity  
95 hypothesis assumes that sex differences occur in the temperature at which fecundity is  
96 maximized (Sims 2005).

97           Sexual segregation has been widely studied among terrestrial animals, particularly  
98 mammals, but only relatively recently in marine organisms (Wearmouth & Sims 2008). Yet,  
99 despite an ongoing interest in sexual segregation in marine animals such as seabirds and  
100 marine mammals (Lewis et al. 2002, Elliott et al. 2010, Phillips et al. 2011, Mancini et al.

101 2013, Baylis et al. 2016, Kernaléguen et al. 2016), the underlying causes and the mechanisms  
102 driving habitat segregation remain poorly understood. In addition, very few studies focused  
103 on between-sex differences in habitat segregation in relation to dynamic oceanographic  
104 features (Pinet et al. 2012, Cleasby et al. 2015, Paiva et al. 2017), thereby limiting our ability  
105 to distinguish between the concurrent sexual segregation hypotheses. Moreover, these studies  
106 come from temperate or tropical areas reflecting a lack of evidence for polar species.  
107 However, foraging strategies may differ between polar, temperate and tropical oceanographic  
108 environments, at least in seabirds (Baduini & Hyrenbach 2003, Weimerskirch 2007).  
109 Furthermore, for practical, technical and ethical reasons most studies that have investigated  
110 sexual segregation on marine animals have focused on large species (Phillips et al. 2011),  
111 complicating the possibility to discriminate between the various hypotheses proposed to  
112 explain sexual segregation.

113 In this study we aimed to quantify sexual differences in the foraging strategies, at sea  
114 distribution, habitat use, and trophic ecology of a sexually dimorphic polar seabird, the snow  
115 petrel, *Pagodroma nivea*, during the incubation period. Snow petrels are endothermic animals,  
116 therefore excluding the thermal niche-fecundity hypothesis as an explanatory hypothesis.  
117 Since predation on this species is occasional and no sex-specific predation is known to occur  
118 (Barbraud 1999), the predation-risk hypothesis can be discounted. Therefore, both the forage-  
119 selection hypothesis and the activity budget hypothesis can be highlighted as possible  
120 mechanisms for segregation in this species. There is considerable overlap between the forage-  
121 selection hypothesis and the activity-budget hypothesis, complicating our ability to make  
122 clear predictions to distinguish between the two, and to estimate the relative support of each  
123 hypothesis (Wearmouth & Sims 2008). Nevertheless, using GPS tracking data, isotopic data  
124 and environmental data we addressed the following main questions: (1) do female snow  
125 petrels differ from males in their foraging tactics, distribution and habitat use?; (2) how are

126 body reserves regulated during incubation in the two sexes?; and (3) do sex-specific  
127 morphological characteristics influence foraging efficiency? Based on results from  
128 comparative studies suggesting that dimorphic seabird species from polar/temperate regions  
129 are more prone to show trophic or spatial segregation than dimorphic species from the tropics  
130 (Mancini et al. 2013), and on a relationship between sexual segregation in diet and sexual size  
131 dimorphism in seabirds (Phillips et al. 2011), we predicted sexual segregation in diet and/or  
132 spatial segregation in the snow petrel, which is one of the most sexually dimorphic seabird  
133 species (Croxall 1982, Fairbairn & Shine 1993).

134

## 135 **2 Material and methods**

### 136 **2.1 Study species**

137 The snow petrel is endemic to Antarctica and the Southern Ocean, with a circumpolar  
138 breeding distribution (Croxall et al. 1995). It is a specialist forager and ship-based  
139 observations indicate that this is the most pagophilic species amongst flying seabirds,  
140 occurring only where there is some degree of sea ice cover (Griffiths 1983, Ainley et al. 1984,  
141 1986), generally within the marginal ice zone and areas of heavy ice concentrations (Ainley et  
142 al. 1992, 1993). Snow petrels forage by flying rapidly along the edges of ice floes, ice shelves  
143 and icebergs in search of its prey (Ainley et al. 1984). The species feeds primarily on fish,  
144 including the myctophid *Electrona antarctica* in oceanic waters and the pelagic nototheniid  
145 *Pleuragramma antarctica* (Antarctic silverfish) in neritic waters; they prey also upon  
146 swarming crustaceans, the Antarctic (*Euphausia superba*) and ice (*E. crystallorophias*) krill,  
147 and the hyperiid amphipod *Themisto gaudichaudii* (Ainley et al. 1984, 1991, Ridoux &  
148 Offredo 1989, Van Franeker & Williams 1992, Ferretti et al. 2001). At Pointe Géologie  
149 (Adélie Land), undetermined fish dominated the chick diet in 1982 (Ridoux & Offredo 1989)  
150 and fish items identified in 1994 were all Antarctic silverfish (authors' unpublished data). Prey

151 are caught by dipping and surface-seizing (Harper et al. 1985) generally on the wing but also  
152 by ambush feeding (Ainley et al. 1984).

153 Snow petrels breed in crevices and under boulders. Adult birds arrive at the colonies in  
154 late October to copulate before departing at sea for a two to three week pre-laying exodus, and  
155 females lay a single egg in early December (Mougin 1968, Isenmann 1970). Incubation lasts  
156  $\approx 44$  days on average during which males and females alternately incubate their egg until  
157 hatching (Brown 1966, Barbraud et al. 1999). After hatching the chick is guarded by parents  
158 alternating short spells until it attains homeothermy. Then the chick is left unattended and  
159 regularly fed by both parents until fledging, which occurs on average  $\approx 47$  days after hatching.  
160 Adults leave the colony during the first two weeks of March before dispersing at sea where  
161 they remain in the sea ice zone during the non-breeding period (Delord et al. 2016).

162

## 163 **2.2 Fieldwork**

164 Fieldwork was carried out at Ile des Pétrels ( $66^{\circ}40'S$ ,  $140^{\circ}01'E$ ), Pointe Géologie  
165 archipelago, Adélie Land, East Antarctica, between 7 December 2015 and 17 January 2016.  
166 This corresponds to the incubation period. On average 550 pairs of snow petrels breed on Ile  
167 des Pétrels in dense colonies or in loosely aggregated nests (CEBC-CNRS unpublished data).  
168 By daily visits at 36 nests, we studied laying dates and the duration of the foraging trips and  
169 incubation shifts of 36 males and 36 females until hatching. Incubating birds were identified  
170 using their metal ring number. Sixty five snow petrels ( $n = 36$  females and  $n = 29$  males) were  
171 tracked with GPS loggers (nanoFix-Geo; PathTrack Limited, UK) during the incubation  
172 period. We tracked only one foraging trip per bird to minimize disturbance and to ensure  
173 independence between trips. The devices weighed 2.2 g, which represented between 0.5% and  
174 0.8% of the birds' mass, thus well below the 3% threshold advised by Phillips et al. (2003).  
175 Birds were manually captured at the nest and weighted ( $\pm 5$  g) in a bag with a Pesola spring

176 balance before being equipped with a GPS. The birds were initially sexed by vocalization  
177 when approached on the nest and handled (male calls have a lower pitch and a lower rhythm  
178 than those of females (Guillotín & Jouventin 1980, Barbraud et al. 2000). GPS units were  
179 deployed on birds about to leave for a foraging trip (i.e. when both partners were at the nest)  
180 and were attached to the two central tail feathers using Tesa® tape. The GPS recorded  
181 locations at 15, 30, 40 or 60 min intervals. Several intervals (15 min, n = 15; 30 min, n = 4; 40  
182 min, n = 43; 60 min, n = 3) were tested to estimate the minimum interval frequency that  
183 allowed the GPS battery to last for a complete foraging trip. Birds were recaptured on the day  
184 they returned to the nest following their foraging trip, weighed, measured (wing length  $\pm$  1  
185 mm with a ruler, tarsus length, bill length, and bill depth  $\pm$  0.1 mm with calipers) and the  
186 loggers were recovered. All birds were recaptured but three birds lost their GPS during the  
187 foraging trip. Data from all other GPS (n = 62) were retrieved successfully.

188

### 189 **2.3 Tissue sampling, molecular sexing and stable isotopes**

190 Adults equipped with GPS and 24 additional individuals (11 females and 13 males) were  
191 sampled during incubation for stable isotope and molecular sexing analyses. A blood sample  
192 from the alar vein was taken immediately after capture of the bird upon return from a foraging  
193 trip using a 1-mL heparinized syringe and a 25-gauge needle and maintained at 4°C until  
194 being processed. Collected blood volumes ranged from 0.50 to 0.80 mL. Blood samples were  
195 separated into plasma and blood cells by centrifugation at 12,000 rpm for 5 min, within 2-3  
196 hours of sampling and stored frozen at -20°C until analyses at the laboratory. For each  
197 individual, 6 whole body feathers were pulled out from the upper chest and stored dry in  
198 sealed individual plastic bags for stable isotope analysis.



199 From a subsample of blood cells, the sex was determined by polymerase chain reaction  
200 amplification of part of two highly conserved genes present on the sex chromosomes as  
201 detailed in Weimerskirch et al. (2005).

202 Stable carbon ( $\delta^{13}\text{C}$ ) and nitrogen ( $\delta^{15}\text{N}$ ) isotope ratios in the blood cells, plasma and  
203 body feathers of snow petrels were determined to investigate the trophic choices of each sex  
204 and consistency of their foraging niche over time. The isotopic method was validated in the  
205 Southern Ocean for several seabird species:  $\delta^{15}\text{N}$  values mainly define the trophic position,  
206 with values increasing with trophic level (Cherel et al. 2010), and  $\delta^{13}\text{C}$  values indicate the  
207 latitude of the foraging habitat (Cherel & Hobson 2007, Jaeger et al. 2010). Plasma has a half-  
208 life of about 3 days (Hobson & Clark 1993), a shorter period than the average trip duration  
209 during incubation ( $\approx 7$  days, Barbraud et al. 1999), and represents prey ingestion and trophic  
210 ecology during the last trip before sampling (Cherel et al. 2005a). Blood cells have a half-life  
211 of about 30 days (Hobson & Clark 1993) and represent dietary information integrated over a  
212 few months. Feathers contain dietary information at the time they were grown, because  
213 keratin is inert after synthesis (Hobson & Clark 1992, 1993, Bearhop et al. 2002). In snow  
214 petrels body moult is a gradual process extending over at least 4 months in summer and  
215 autumn. It begins during incubation, but most body feathers grow in the weeks following  
216 completion of breeding, i.e. from February to April (Maher 1962, Beck 1969). Therefore,  
217 isotopic values of body feathers contain information about diet near the end of the previous  
218 breeding season and the beginning of the previous non-breeding season.

219 Feathers (one single feather per bird) were cleaned to remove surface contaminants using  
220 a 2:1 chloroform:methanol solution followed by two methanol rinses. They were then oven  
221 dried for 48 h at 50°C and cut into small pieces using stainless steel scissors. Blood cells and  
222 plasma samples were freeze-dried and powdered. Since avian plasma, unlike blood cells,  
223 contains a high and variable lipid content that affect its  $\delta^{13}\text{C}$  values, lipids were removed from

224 plasma samples using chloroform/methanol (Cherel et al. 2005a, Cherel et al. 2005b). Then,  
225 tissue sub-samples were weighed with a microbalance (aliquots mass:  $\approx 0.3$  mg dw), packed  
226 in tin containers, and nitrogen and carbon isotope ratios were subsequently determined at the  
227 laboratory LIENSs by a continuous flow mass spectrometer (Thermo Scientific Delta V  
228 Advantage) coupled to an elemental analyser (Thermo Scientific Flash EA 1112). Results are  
229 presented in the usual  $\delta$  notation relative to Vienna PeeDee Belemnite and atmospheric  $N_2$  for  
230  $\delta^{13}C$  and  $\delta^{15}N$ , respectively. Replicate measurements of internal laboratory standards  
231 (acetanilide and peptone) indicate measurement errors  $<0.15$  ‰ for both  $\delta^{13}C$  and  $\delta^{15}N$   
232 values.

233

#### 234 **2.4 Foraging analysis and spatial usage**

235 Spatial and statistical analyses were performed using R 3.2.1 using the “stats” package (R  
236 Development Core Team 2015) and “*adehabitatLT*” package (Calenge 2006, Calenge et al.  
237 2009). From the GPS recorded data, foraging trips were reconstructed and data were  
238 rediscrretized to have one location each 40 min. Some of the trips were largely incomplete  
239 (return journey not initiated;  $n = 15$  corresponding to the 15 min intervals) because of battery  
240 limitations and were removed from the analysis. For each complete ( $n = 40$ ) and incomplete  
241 (return journey initiated;  $n = 7$ ) foraging trip, we computed the following foraging indices:  
242 maximum distance to the colony ( $D_{max}$ , km), average movement speed ( $MS$ ,  $km\ h^{-1}$ ) and  
243 daily distance covered ( $D_{day}$ ,  $km\ d^{-1}$ ). For each complete trip, we calculated the additional  
244 following metrics: total distance travelled ( $D_{total}$ , km) and trip duration ( $T$ , h). Spatial  
245 distribution of snow petrels was investigated by producing utilization distributions (UDs 25%,  
246 50%, 75% and 95%; Worton 1989) for each individual, using kernel analysis with a cell size  
247 of  $0.1^\circ \times 0.1^\circ$  and a smoothing parameter ( $h$ ) that was estimated using the ad hoc method href.  
248 Grid cell size was based on the mean accuracy of the devices ( $\approx 10$  m), the mean maximum

249 speed of flying snow petrels (see Results) and on the time interval between two GPS locations  
250 (40 min). To investigate whether space use differed between sexes, we calculated observed  
251 overlaps in each UD representing the high core (25%), core (50%), middle (75%) and general  
252 (90%) use areas using utilization distribution overlap index (UDOI), which is the most  
253 appropriate measure of quantifying similarity among UD estimates (Fieberg & Kochanny  
254 2005). The extent of overlap between male and female home ranges was estimated using  
255 Bhattacharyya's affinity (BA), which ranges from 0 (no overlap) to 1 (complete overlap).  
256 Using these metrics we performed a randomization procedure to test the null hypothesis that  
257 there was no difference in the spatial distribution of males and females at the population level  
258 (Breed et al. 2006). The sex of each bird was randomly assigned using the observed sex ratio  
259 in our data set and the overlap metric between males and females was calculated for 25%,  
260 50%, 75% and 95% kernels. We performed 1000 randomizations of our dataset from which  
261 the probability of accepting the null hypothesis was calculated as the proportion of random  
262 overlaps that were smaller than the observed overlap. Since we were testing only if the  
263 observed overlap was smaller than random overlap, we considered this as a one-tailed test.  
264 Second, we tested the null hypothesis that there was no difference in the extent of overlap in  
265 spatial distribution of males and females at the individual level.

266 For each foraging trip we also calculated the following metrics from the phenotypic data:  
267 the body mass change ( $\Delta m$ , in g) between departure and arrival of a foraging trip, the daily  
268 mass gain ( $M_{day}$ , in  $g \cdot day^{-1}$ ) calculated as the ratio between  $\Delta m$  and the trip duration, the  
269 proportion mass gain calculated as the ratio between  $\Delta m$  and mass at departure for a foraging  
270 trip, and the proportion daily mass gain calculated as the ratio between  $M_{day}$  and mass at  
271 departure for a foraging trip. A body condition index before departure and after return from a  
272 foraging trip was also calculated. To estimate the body condition we used the body  
273 measurements to calculate the scale mass index (SMI) as recommended by Peig and Green

274 (2009, 2010). The SMI adjusts the mass of all individuals to that expected if they had the  
275 same body size. We used the score of the first axis of a principal component analysis (PC1)  
276 combining wing, bill, tarsus lengths and bill depth to characterize body size. PC1 accounts for  
277 70.9% of the total variance and all measurements are highly correlated with PC1 (Pearson's  $r$   
278  $> 0.80$ ;  $P < 0.001$ ). The SMI was calculated for each individual  $i$  according to the formula:

$$SMI_i = M_i * \left( \frac{L_0}{L_i} \right)^b$$

279 where  $M_i$  and  $L_i$  are, respectively, the body mass and the PC1 score of the individual  $i$ ,  $L_0$ , is  
280 the value of PC1 for the whole studied population and  $b$  the slope estimate of the RMA  
281 (Reduced Major Axis) regression of log-transformed body mass on log-transformed PC1.

282

## 283 **2.5 Foraging habitat covariates**

284 To investigate the foraging habitats used by males and females, the tracking locations were  
285 categorized as occurring during commuting (outward and inward) or foraging (middle) stage  
286 of foraging trips, as commonly used for central-place foragers. Among Procellariiformes the  
287 distinction between these stages varies greatly between species and breeding stages  
288 (Weimerskirch et al. 1997, Phillips et al. 2009). Moreover, at the individual level defining  
289 objectively the transition between such behaviors may prove to be difficult (Phillips et al.  
290 2009, Wakefield et al. 2009). To avoid this pitfall, we applied the method used by Wakefield  
291 et al. (2009) and Phillips et al. (2009) to determine the stage of the trips at which the  
292 transitions occurred at the population level. For each location within a foraging trip the ratio  
293  $d_{col}/D_{max}$  was calculated, where  $d_{col}$  is the distance from the colony and  $D_{max}$  is the maximum  
294 distance from the colony reached during that trip. The ratio  $t/T$  was also calculated, where  $t$  is  
295 the time elapsed since the beginning of the trip and  $T$  is the total trip time. Then, the total  
296 variance in  $d_{col}/D_{max}$  for all locations occurring before  $t/T$  was plotted against  $t/T$ . The point of  
297 inflexion of this curve was determined as well as the value of  $t/T$  at this point. Tracking

298 locations recorded before this point were classified as those corresponding to the outward trip.  
299 Similarly, the total variance in  $d_{col}/D_{max}$  occurring after  $t/T$  was plotted against  $t/T$  and the  $t/T$   
300 value from which a monotonic decrease of the variance began was recorded. Tracking  
301 locations recorded after this point were classified as those corresponding to the return trip, and  
302 locations between both points were considered as foraging locations.

303 Previous studies have shown that the snow petrel is a sea ice obligate species and remains  
304 highly associated with sea ice year round (Griffiths 1983, Ainley et al. 1984, 1986, 1992,  
305 1993, Delord et al. 2016). We therefore used sea ice concentration (SIC) to describe the  
306 foraging habitat of snow petrels. Although sea surface temperature is commonly used to  
307 describe foraging habitats in seabirds, there are very few sea surface temperature observations  
308 in regions covered by sea ice, especially in the Southern Ocean (Rayner et al. 2003).  
309 Therefore this covariate could not be used. We used passive-microwave estimates of daily sea  
310 ice concentration from the Special Sensor Microwave Imager (SSM/I) brightness  
311 temperatures ( $12.5 \times 12.5$  km resolution) from the Institut Français de Recherche pour  
312 l'Exploitation de la Mer (Ifremer, [ftp://ftp.ifremer.fr/ifremer/cersat/products/gridded/psi-](ftp://ftp.ifremer.fr/ifremer/cersat/products/gridded/psi-concentration/data/antarctic)  
313 [concentration/data/antarctic](ftp://ftp.ifremer.fr/ifremer/cersat/products/gridded/psi-concentration/data/antarctic)). We also used bathymetry data (ocean depth at one-minute  
314 horizontal spatial resolution) obtained from NOAA's ETOPO  
315 (<https://sos.noaa.gov/datasets/etopo1-topography-and-bathymetry/>) as an additional habitat  
316 variable. Daily sea ice concentration and depth values were extracted for each foraging  
317 location (therefore excluding the commuting part of the trips at sea) on each track using  
318 bilinear interpolation from the native ice and depth grids using “*raster*” package in R  
319 (Hijmans 2018). Since snow petrels are highly associated with the sea ice region (as defined  
320 by the region within >15% sea ice concentration isocline, Cavalieri et al. 1991), the SIC data  
321 were filtered to retain SIC values >15%.

322

## 323 **2.6 Statistical analysis**

324 Isotopic niche of the two sexes was established using the metric SIBER (Stable Isotope  
325 Bayesian Ellipses), which is based on a Bayesian framework that confers a robust comparison  
326 to be made among data sets concerning different sample sizes (Jackson et al. 2011). The area  
327 of the standard ellipse ( $SEA_C$ , an ellipse having a 40% probability of containing a  
328 subsequently sampled datum) was used to compare female and male isotopic values and their  
329 overlap in relation to the total niche width (i.e. both sexes combined), and a Bayesian estimate  
330 of the standard ellipse and its area ( $SEA_B$ ) was used to test whether females' isotopic niche is  
331 narrower than males' isotopic niche (Jackson et al. 2011). The *standard.ellipse* and  
332 *convexhull* functions were used to calculate these metrics from SIBER implemented in the  
333 package 'SIAR' (Parnell et al. 2010) under R.

334 Consistency in foraging niche was estimated following Votier et al. (2010) and Ceia et al.  
335 (2012), by regressing stable isotope ratios in plasma on those of blood cells to obtain an index  
336 of consistency in carbon source (habitat) and trophic level. Since  $\delta^{13}C$  has a trophic  
337 component, we used the studentized residuals of the relationship with  $\delta^{15}N$  in the same tissue  
338 (male plasma:  $F_{1,25}=1.438$ ,  $P=0.242$ ,  $r=0.233$ ; male blood cells:  $F_{1,36}=0.838$ ,  $P=0.366$ ,  
339  $r=0.151$ ; female plasma:  $F_{1,33}=1.470$ ,  $P=0.234$ ,  $r=0.206$ ; female blood cells:  $F_{1,45}=6.507$ ,  
340  $P=0.014$ ,  $r=0.355$ ) to determine the degree of short-term repeatability in  $\delta^{13}C$  independently  
341 of trophic effects. Longer-term foraging consistency was estimated by regressing stable  
342 isotope values of blood cells (actual breeding period) with those of feathers (most likely the  
343 end of the previous breeding period and subsequent fall at sea). We also used the residuals to  
344 correct the trophic component associate with  $\delta^{13}C$  by regressing these values upon  $\delta^{15}N$   
345 signatures in feathers (male:  $F_{1,36}=1.945$ ,  $P=0.172$ ,  $r=0.226$ ; female:  $F_{1,45}=5.863$ ,  $P=0.020$ ,  
346  $r=0.340$ ).

347 Foraging probability was modelled using a binomial generalized additive mixed model  
348 (GAMM) in the ‘*gamm4*’ package in R (Wood et al. 2017). This allowed for the possibility of  
349 nonlinear responses to environmental covariates, which we expected. The response variable  
350 was the tracking location, which was coded as 1 for a foraging location and as 0 for a  
351 commuting location, and explanatory variables were sea ice concentration and bathymetry.  
352 Because interactions between the variable sex and environmental covariates would be difficult  
353 to interpret in complex nonlinear models, separate models were developed for male and  
354 female birds. Models included sea ice concentration and bathymetry as fixed factors, and bird  
355 identity as a random term to account for pseudoreplication issues. The smoothing parameter  
356 was chosen automatically using generalized cross-validation. To model spatial auto-  
357 correlation an isotropic thin plate spline was included, set up as a two dimensional smoother  
358 based on both x and y coordinates (Cleasby et al. 2015). To ascertain whether collinearity  
359 between covariates may have occurred we examined the correlations between environmental  
360 variables using a Spearman correlation coefficient since covariates were not normally  
361 distributed. We assumed that a correlation of greater than  $r_s$  0.4 was problematic, but the  
362 correlation was below this threshold ( $r_s = 0.14$ ).

363 Foraging intensity was modelled using GAM in the ‘*gam*’ package in R (Hastie &  
364 Tibshirani 1990). Foraging intensity was defined based on the frequency distribution of the  
365 tracking locations classified as foraging only. The environmental covariates were divided into  
366 K classes. Then, within each class the number of foraging locations was extracted and the  
367 count was used as the response variable. A GAM with a quasi-Poisson distribution was then  
368 fitted to the data. Separate models were developed for male and female birds. Models  
369 included sea ice concentration and bathymetry as fixed factors. The smoothing parameter was  
370 chosen automatically using generalized cross-validation. For SIC we used K=1% SIC classes  
371 and for bathymetry we used K=50 m classes.

372 Differences between sexes in body measurements, sea ice characteristics used, and  
373 foraging trip metrics were tested using Student's t-tests and differences in stable isotope data  
374 using Student's t-tests and Wilcoxon rank tests. Since we performed a large number of tests  
375 when comparing male and female body size measurements, isotopic values and foraging trip  
376 characteristics, we used the Benjamini-Hochberg procedure (Benjamini & Hochberg 1995) to  
377 control for false discovery rate. We chose a false discovery rate ( $q^*$ ) of 0.10 when applying  
378 the Benjamini-Hochberg procedure. This choice was motivated by the fact that this study was  
379 conducted on a single year and was exploratory. In such cases setting a FDR to an extremely  
380 low value results in decreasing the statistical power for detecting genuine effects and several  
381 authors recommend setting FDR to a relatively large value (Yoccoz 1991, Field et al. 2004,  
382 Roback and Askins 2005).

383

### 384 **3 Results**

385 Male snow petrels were larger than females, particularly for bill length and bill depth, and  
386 were 10% heavier than females (Table 1). Bill length, bill depth and body mass were the most  
387 sexually dimorphic phenotypic traits.

388

#### 389 **3.1 Spatial distribution of males and females and habitat differences**

390 Males and females foraged in offshore waters to the east and to the west of the colony in  
391 equal proportions ( $\chi^2=0.03$ ,  $p=0.86$ , Figure 1). Space-use sharing was similar between males  
392 and females as the UDOI was not significantly lower than the null expectation for 25%, 50%,  
393 75% or 95% UD's (Table 2). The 95% UDOI was  $> 1$ , indicating a higher than normal overlap  
394 between male and female UD's relative to uniform space use, i.e. male and female UD's were  
395 non-uniformly distributed and had a high degree of overlap. By contrast, the 25% UDOI was  
396 relatively close to 0 indicating less overlap between male and female UD's relative to uniform



397 space use. Males and females UD were also similar whatever the UD considered since BA  
398 were not significantly lower than the null expectation for 25%, 50%, 75% or 95% UD (Table  
399 2).

400 In average males foraged in areas with higher SIC than females (Table 3). Fitted models  
401 on foraging probability contained sex-specific smoothers for bathymetry and SIC (Table 4).  
402 For females, the GAMM model explained 10% of the deviance of foraging probability. All  
403 smoothers for SIC and bathymetry were significant (Table 4). Foraging probability increased  
404 sharply with increasing SIC up to 30% and more smoothly for high SIC (Figure 2). Foraging  
405 probability showed a first peak at depth of  $\approx 600$  m and a second and high peak at depth of  
406  $\approx 1600$  m. Foraging probability sharply increased at depths  $>2500$  m but sample size was  
407 small and there was high uncertainty. Both the random intercept for bird identity and the  
408 spatial smoother were significant.

409 For males, the model explained 4.6% of the deviance of foraging probability. All  
410 smoothers for SIC and bathymetry, the random intercept for bird identity and the spatial  
411 smoother were significant (Table 4). Male foraging probability varied non-linearly with SIC  
412 and bathymetry. It increased smoothly with increasing SIC, and was higher when SIC was  
413 higher than  $\approx 90\%$  (Figure 2). Foraging probability also increased with bathymetry up to  $\approx 600$   
414 m and remained relatively stable until  $\approx 2000$  m from which it increased.

415 Female foraging intensity was non-linearly related to SIC and bathymetry (Table 5).  
416 Foraging intensity increased with SIC up to a maximum for SIC  $\approx 40\%$  and then decreased for  
417 higher SIC (Figure 3). Lowest foraging intensity was observed for SIC  $>80\%$ . Foraging  
418 intensity showed a rather bimodal distribution as a function of bathymetry. It was maximal in  
419 waters  $\approx 400$  m deep, then decreased to reach a minimum at  $\approx 1400$  m, and increased again for  
420 water depths between  $\approx 2000$ - $2700$  m. Male foraging intensity was non-linearly related to SIC  
421 and bathymetry (Table 5). It showed a bimodal distribution as a function of SIC, with a

422 maximum for SIC  $\approx$ 36% and a second peak for SIC  $\approx$ 85% (Figure 3). As for females, male  
423 foraging intensity was bimodal as a function of bathymetry. It was maximal in waters  $\approx$ 400 m  
424 deep, then decreased to reach a minimum at  $\approx$ 1500 m, and increased up to a second peak in  
425 waters  $\approx$ 2400 m deep.

426

### 427 **3.2 Stable isotope ratios**

428 Male plasma, blood cells and feathers had significantly 0.6-0.8‰ higher  $\delta^{15}\text{N}$  values than  
429 those of females (Table 6). There was no difference in  $\delta^{13}\text{C}$  values between males and  
430 females, except for plasma for which males had higher values. Males and females had similar  
431  $\text{SEA}_B$  for all tissues (Figure 4). Overlap between  $\text{SEA}_B$  areas for males and females was  
432 0.462, 0.586 and 0.599 for blood cells, plasma and feathers, respectively.

433 Strong significant positive relationships were found in  $\delta^{15}\text{N}$  between blood cells and  
434 plasma (males:  $F_{1,25}=18.846$ ,  $P<0.001$ ,  $r=0.656$ ; females:  $F_{1,33}=31.679$ ,  $P<0.001$ ,  $r=0.700$ ;  
435 Figure 5), but not between feathers and blood cells (males:  $F_{1,36}=0.036$ ,  $P=0.850$ ,  $r=0.032$ ;  
436 females:  $F_{1,45}=0.062$ ,  $P=0.805$ ,  $r=0.037$ ). No significant positive relationship was found in  
437 residual  $\delta^{13}\text{C}$  between blood cells, plasma and feathers (all  $p$ 's $>0.243$ ).

438 There was no significant relationship between isotopic values and body measurements or  
439 body condition (all  $p$ 's $>0.08$ ).

440

### 441 **3.3 Foraging trip performance and foraging efficiency**

442 Foraging trip duration, length, speed and directions (Table 7), as well as mass gain and  
443 proportion mass gain (Table 8) did not differ between males and females. Foraging efficiency,  
444 measured as the proportionate daily mass gain while foraging, was significantly greater for  
445 females than for males (Table 8), and was greater for larger females with deeper bills (PC1:  
446  $F_{1,20}=5.279$ ,  $P=0.033$ ,  $r=0.457$ ; bill depth:  $F_{1,20}=8.630$ ,  $P=0.008$ ,  $r=0.549$ ). In females, but not

447 in males, foraging efficiency decreased with the duration of the foraging trip (Figure 6).  
448 Females were more efficient than males during short (<2 days) foraging trips, but for trips  
449 longer than 2 days, foraging efficiency was similar in males and in females (daily mass gain:  
450  $t_{39}=0.397$ ,  $P = 0.693$ ; proportion daily mass gain :  $t_{39}=0.862$ ,  $P = 0.394$ ).

451

### 452 **3.4 Regulation of the foraging trips**

453 To investigate how birds regulate foraging trips according to the depletion of their body  
454 reserves, we correlated the body condition at departure with the duration of the foraging trips  
455 and the mass gain metrics while foraging. Foraging trip duration was not correlated to body  
456 condition at departure (Pearson correlation coefficient:  $p = 0.417$  for females,  $p = 0.576$  for  
457 males), but mass gain and proportionate mass gain were negatively related to body condition  
458 at departure for both sexes (all  $P$ 's<0.005; Figure 6). In addition, in males, but not in females,  
459 daily mass gain and proportionate daily mass gain were negatively correlated to body  
460 condition at departure (males: all  $P$ 's<0.010; females: all  $P$ 's>0.429). Male (but not female)  
461 body condition at return from a foraging trip was positively correlated to the time spent at sea  
462 (Pearson correlation coefficient:  $p = 0.05$ ).

463

### 464 **3.5 Factors affecting mass gain at sea**

465 For females, but not for males, mass gain, proportion mass gain and body condition at return  
466 from a foraging trip were positively correlated to mean and maximum sea ice concentration of  
467 the foraging trip locations (females: all  $P$ <0.049; males: all  $P$ >0.232; Figure 7). For males and  
468 females, there was no relationship between bathymetry and mass gain, proportion mass gain,  
469 and body condition at return (all  $P$ >0.100).

470

## 471 **4 Discussion**

472 This study provides clear evidence of sexual segregation and foraging tactics in snow petrels.  
473 In accordance with our prediction, we found evidence for sexual segregation in diet, with  
474 males feeding on average on higher trophic level prey when compared to females, but no  
475 evidence for spatial segregation as indicated by spatial data and  $\delta^{13}\text{C}$  isotopic data. Males and  
476 females differed in their usage of sea ice, providing evidence for sex-specific habitat  
477 segregation.

478

#### 479 **4.1 Differences in habitat use**

480 During incubation males and females foraged predominantly in pack-ice areas over the deep  
481 Antarctic continental shelf and adjacent continental margin (500-900 m, due to the isostatic  
482 effect of the ice sheet), and to a lesser extent in oceanic waters. These results are consistent  
483 with previous observational work at sea showing that high densities of breeding snow petrels  
484 in the Ross Sea were found within the pack ice along the continental slope (Ainley et al.  
485 1984). The low tissue  $\delta^{13}\text{C}$  values of snow petrels is a consistent characteristic of consumers  
486 foraging in high-Antarctic waters (Cherel 2008, Cherel et al. 2011). Blood cell, plasma and  
487 feather  $\delta^{13}\text{C}$  values were similar in males and females, which indicates that both sexes foraged  
488 offshore in pelagic waters without an obvious neritic-oceanic  $\delta^{13}\text{C}$  gradient in high-Antarctica  
489 (Cherel et al. 2011). Blood cell and plasma  $\delta^{13}\text{C}$  values of birds from Adélie Land were  
490 similar to values obtained from snow petrel muscle tissue in the Weddell Sea (Rau et al. 1992)  
491 between 64°S and 66°S, but were slightly lower than those measured in whole blood of birds  
492 from Hop Island (Hodum & Hobson 2000). However, the shape of the relationships between  
493 foraging intensity and SIC suggested that males and females used different sea ice habitats.  
494 Female foraging intensity was highest for SIC between  $\approx 20\%$  and  $\approx 40\%$ , and then decreased  
495 non-linearly for higher SIC, with a sharp decrease for SIC higher than  $\approx 70\%$ . By contrast  
496 male foraging intensity remained high for high SIC. Therefore, although foraging intensity

497 decreased with increasing SIC for both sexes, males foraged more intensively in high sea ice  
498 concentration areas (> 70%) than females. Males and females made greater use of pack-ice  
499 areas over the continental shelf and continental margin than of oceanic pack-ice areas, but  
500 males were more likely to forage and foraged more intensively on the continental margin (-  
501 550 to -950 m) than females.

502 Few studies have simultaneously quantified between-sex differences in habitat use and  
503 foraging behavior in marine species in relation to dynamic oceanographic features such as sea  
504 ice. In the northern gannet (*Morus bassanus*), sexual segregation was driven largely by spatial  
505 and habitat segregation with males, smaller than females, mainly foraging in coastal mixed  
506 waters where net primary production was high, and females mainly foraging in offshore  
507 stratified waters (Cleasby et al. 2015). Similarly, the sex-specific habitat use reported in the  
508 monomorphic Barau's petrel (*Pterodroma barau*) during the prelaying exodus (males used  
509 more frequently marine areas with high productivity) can be partly explained by spatial  
510 segregation between sexes (Pinet et al. 2012). During the incubation and chick rearing period,  
511 they did not find evidence for habitat segregation and foraging areas largely overlapped. In  
512 the Adélie penguin (*Pygoscelis adeliae*) at Pointe Géologie, females foraged more intensively  
513 in areas of higher sea ice concentration than males during the guard stage, and there was  
514 spatial segregation between sexes with females foraging further from the colony than males  
515 (Widmann et al. 2015). Using a multiyear comprehensive dataset, Paiva et al. (2017) found  
516 that sexual segregation in foraging areas and foraging habitats of Cory's shearwaters  
517 (*Calonectris borealis*) varied between years, with greater sexual (habitat and spatial)  
518 segregation during years when sea surface temperatures were higher and chlorophyll *a*  
519 concentrations were lower, presumably corresponding to lower food availability. In favorable  
520 years no spatial segregation was observed and habitat segregation was low. The hatching  
521 success of snow petrels during the 2015/2016 breeding season was 46.9%, i.e. lower than the

522 long-term average of 63.3% (Chastel et al. 1993), suggesting that environmental conditions  
523 were relatively poor. However, we did not observed spatial segregation between sexes but  
524 foraging habitat use differed, with males foraging more frequently in high sea ice  
525 concentration areas than females. Such a pattern was found in the wandering albatross  
526 (*Diomedea exulans*) at South Georgia in which, despite no clear sexual segregation at large  
527 scales, sex-specific microhabitat selection was found during the chick-rearing period,  
528 resulting in sexual segregation in core foraging areas (Pereira et al. 2018). Multiple years of  
529 tracking are needed to shed light into the effects of environmental stochasticity (sea ice  
530 variability) on habitat segregation and spatial segregation.

531 As opposed to other highly sexually size-dimorphic seabirds (wandering albatross:  
532 Weimerskirch et al. 1993, giant petrels *Macronectes spp.*: Gonzáles-Solís et al. 2000, boobies  
533 *Sula spp.*: Weimerskirch et al. 2009, frigatebirds *Fregata spp.*: Hennicke et al. 2015) snow  
534 petrels did not show spatial segregation in their foraging habitat during incubation. Spatial  
535 segregation in snow petrels may occur during other periods of the year such as during the  
536 chick-rearing period when which food requirements are particularly high for provisioning the  
537 chick. Alternatively, this lack of spatial segregation may be constrained by the specific  
538 foraging habitat requirements of snow petrels. These seabirds forage exclusively in a sea ice  
539 environment, which is limited during the breeding season around breeding colonies and may  
540 thus constraint males and females to spatially overlap at a broad spatial scale.

541

#### 542 **4.2 Influence of sex on diet and foraging tactics**

543 The snow petrel diet is relatively well known during the chick-rearing period and isotopic  
544 data together with prey biometric data suggest that snow petrels mainly feed on postlarvae  
545 and juvenile Antarctic silverfish (*Pleuragramma antarcticum*) (Ridoux & Offredo 1989,  
546 Hodum & Hobson 2000, Pinkerton et al. 2013). Although, snow petrel diet during incubation

547 remains poorly known,  $\delta^{15}\text{N}$  values obtained in our study are similar or slightly higher than  
548 those found in other studies during the chick rearing period (Hodum & Hobson 2000, Delord  
549 et al. 2016), suggesting a similar diet. Nevertheless, and despite large overlap in their core  
550 isotopic niches as indicated by the standard ellipse areas, female snow petrels had lower  $\delta^{15}\text{N}$   
551 values than males for all tissues sampled, which suggests they were feeding on lower trophic  
552 level prey than males. Similar results were found by Tartu et al. (2014) for blood cells during  
553 the pre-laying period. We speculate that there might be at least two reasons for this. First,  
554 compared to males, females may feed more frequently on other prey than Antarctic silverfish,  
555 such as crustaceans which are situated at a lower trophic level than Antarctic silverfish.  
556 Indeed, diet studies indicate that snow petrels also feed on crustaceans such as *Euphausia*  
557 *superba*, *E. crystallorophias*, *Themisto gaudichaudii*, and other amphipods (Ainley et al.  
558 1984, Ridoux & Offredo 1989) which have lower  $\delta^{15}\text{N}$  values than Antarctic silverfish  
559 (Pinkerton et al. 2013). Second, females may feed on Antarctic silverfish in similar  
560 proportions than males but on smaller sized individuals (i.e. younger). It is known that  $\delta^{15}\text{N}$   
561 values increase with body length (and age) in Antarctic silverfish from  $\approx 7\text{-}8\%$  in larvae (10-  
562 20 mm standard length) to  $\approx 10\text{-}11\%$  in juvenile and adult fish (Giraldo et al. 2011, Pinkerton  
563 et al. 2013). It is currently unknown whether sea ice concentration and characteristics  
564 differentially affect the spatial distribution of Antarctic silverfish age-classes. However, it is  
565 likely that females fed more on crustaceans than on young silverfish since crustaceans have  
566 much lower  $\delta^{15}\text{N}$  values than young silverfish (Cherel 2008). Thus, our results suggest that  
567 males ate more silverfish in areas with higher sea ice concentration.

568       The strong positive relationship between plasma  $\delta^{15}\text{N}$  and blood  $\delta^{15}\text{N}$  indicates short term  
569 (over weeks) consistency in trophic level between successive foraging trips during incubation.  
570 Values of  $\delta^{15}\text{N}$  in plasma and feathers did not differ in both sexes (Appendix 1), but blood  
571  $\delta^{15}\text{N}$  were smaller than feather and plasma  $\delta^{15}\text{N}$  in both sexes, suggesting that males and

572 females fed on lower trophic level prey prior to incubation than during the breeding season.  
573 Short and long term consistency in foraging water masses was also low as indicated by the  
574 lack of relationship between plasma and blood  $\delta^{13}\text{C}$ , and between feather and blood  $\delta^{13}\text{C}$ ,  
575 respectively. Indeed tracking data indicated that birds foraged on the continental shelf,  
576 continental margin, and to a lesser extent in oceanic waters. Values of  $\delta^{13}\text{C}$  in feathers were  
577 higher than those in blood and plasma for both sexes (Appendix 1), suggesting that during the  
578 latter part of the breeding season and the beginning of the non-breeding season snow petrels  
579 foraged in more oceanic waters (snow petrels start molting during the chick rearing period  
580 and until early May (Beck 1969, 1970, Delord et al. 2016). This period coincides with the sea  
581 ice growth and its northward extension.

582 The negative relationship between mass gain (and proportion daily mass gain) during a  
583 foraging trip and body condition at departure for a foraging trip (i.e. at the end of fasting  
584 while incubating the egg), indicated that males and females were able to regulate their body  
585 reserves as found in other Procellariiform species (Chaurand & Weimerskirch 1994,  
586 Gonzáles-Solís et al. 2000). Although both sexes regulated body condition, this ability seemed  
587 greater for females than for males. Indeed, body condition at departure for a foraging trip was  
588 lower in females than in males, but similar for both sexes at return from a foraging trip despite  
589 similar trip durations. This is further supported by the fact that females had higher daily mass  
590 gains and proportion daily mass gains than males. However, this greater ability in females  
591 may be partly explained by the fact that females undertook short foraging trips during which  
592 mass gain was particularly high (Figure 1). Although some males also made short foraging  
593 trips, mass gain was still lower than female mass gain during these trips. Therefore, these  
594 results suggest that female foraging efficiency was similar in males and females, except  
595 during short (<2 days) foraging trips during which females appeared more efficient. We  
596 suspect that some females undertook short foraging trips during their incubation shift in order



597 to restore their body condition to avoid abandoning the egg while their partner was foraging at  
598 sea. This could result from the lower fasting capacities of females compared to males due to  
599 their smaller body size (Barbraud & Chastel 1999).

600 Interestingly, the ability of females (but not of males) to restore their body condition  
601 during a foraging trip was affected by sea ice concentration. Indeed, female body condition at  
602 return from a foraging trip was positively related to sea ice concentration in the foraging area,  
603 contrary to males. This suggests that areas with heavy sea ice concentration were more  
604 profitable. This is further supported by the positive relationship between male (but not  
605 female) body condition at return from a foraging trip and time spent at sea, and given that  
606 males foraged more frequently in high sea ice concentration areas. Thus, foraging on highly  
607 nutritional preys such as silverfish in high sea ice concentration areas might be more efficient  
608 to restore body condition than feeding in more open water areas.

609 Body condition at the start of a foraging trip was not related to the time spent at sea,  
610 suggesting that the time spent at sea was not only dependent on the restoration of body  
611 condition. Although only a few birds returned to undertake the next incubation shift after  
612 losing mass ( $n = 3$ , 6.3%) or without gaining mass ( $n = 3$ , 6.3%), this suggests that mass gain  
613 alone does not explain the decision to return to the colony. Perhaps birds took into account the  
614 increased probability of partners deserting the egg with the increasing duration of the foraging  
615 trip (Tveraa et al. 1997).

616 Thus, incubating female snow petrels seemed more efficient at restoring their body  
617 condition during a foraging trip despite similar trip duration, length or speed, while foraging  
618 areas were identical to those of males at a broad spatial scale. However, this higher efficiency  
619 mainly concerned short (<2 days) foraging trips. In addition, our results show that females  
620 foraging in high sea ice concentration areas foraged more efficiently (this relationship holds  
621 when excluding foraging trip <2 days), and female fed on lower trophic level preys that

622 males. Together, these results suggest that areas with high sea ice concentration may be more  
623 profitable for resource acquisition, perhaps due to higher abundance, availability or quality of  
624 prey such as the Antarctic silverfish.

625

### 626 **4.3 Factors underlying sexual segregation**

627 Sex differences in foraging behavior could result from the influence of sexual size  
628 dimorphism on foraging efficiency and intra-specific competition (forage-selection hypothesis  
629 and scrambled competition hypothesis). The positive relationship between female bill depth  
630 and proportion daily mass gain suggests that foraging efficiency is size dependent in females,  
631 which are smaller than males. Our results also suggest that the most favorable areas were  
632 areas of high sea ice concentration (females body condition at return increased with increase  
633 sea ice concentration, male body condition at return increased with foraging trip length),  
634 which were used less frequently by females. Therefore, it is possible that females were  
635 excluded from high sea ice concentration areas via direct competition. This could possibly  
636 indicate that male and female snow petrels try to avoid competition and thus diverged in  
637 habitat preference in more profitable areas, where intra-specific competition might be more  
638 intense. Such a mechanism was also proposed to explain sex-specific differences in broad  
639 scale foraging areas in highly sexually size dimorphic species (wandering albatross:  
640 Weimerskirch et al. 1993, Shaffer et al. 2001; giant petrels: Gonzáles-Solís et al. 2000), but  
641 also in foraging habitat at a microhabitat scale (Pereira et al. 2018). A major assumption of  
642 the intersexual competition hypothesis is that prey capture should be a function of bill size  
643 (Selander 1966, Shine 1989). Although we do not have the data in hand to test this prediction  
644 explicitly, we note that  $\delta^{15}\text{N}$  values suggested that females consumed lower sized prey than  
645 males (crustaceans vs fish). Females with thicker bills were also more efficient during their

646 foraging trip, suggesting they were feeding on more profitable prey, and bill size was among  
647 the most sexually dimorphic phenotypic trait in this species.

648 Sex-specific niche divergence and habitat segregation can also arise from a difference  
649 between sexes in parental roles and investment (the activity budget hypothesis, Clarke et al.  
650 1998, Thaxter et al. 2009, Weimerskirch et al. 2009, Pinet et al. 2012). Although males  
651 undertake a greater investment in chick provisioning though higher feeding frequencies  
652 (Barbraud et al. 1999), there is little differentiation in the reproductive role of male and  
653 female snow petrels during incubation. Males make slightly shorter foraging trips than  
654 females during incubation (Isenmann 1970, Barbraud et al. 1999), but in average the total  
655 time spent foraging during the incubation period is very similar for both sexes (males: average  
656 19.8 days, females: average 21.0 days, Barbraud 1999), indicating that the roles of male and  
657 female snow petrels do not appear to differ substantially during incubation. Therefore, it  
658 seems unlikely that such limited constraints related to reproductive role specialization could  
659 explain why female snow petrels foraged less intensively in high sea ice concentration areas;  
660 this hypothesis can probably, therefore, be discounted. Sex-specificity in flight performance  
661 may also be responsible for sexual segregation (Shaffer et al. 2001, Phillips et al. 2004).  
662 Indeed, sexual dimorphism in wing area and wing loading in several albatross species may  
663 partially explain large-scale sexual segregation in foraging areas in these species: sex-specific  
664 foraging locations were likely influenced by activity budgets since smaller birds are more  
665 efficient flyers. Therefore, other aspects of the morphology not measured here, such as wing  
666 loading and agility, may be important. Female snow petrels appear to have a lower aspect  
667 ratio and lower wing loading than males (Spear & Ainley 1998), suggesting they might be  
668 less flight efficient but more maneuverable than males. However, since there was no spatial  
669 segregation between sexes at large-spatial scales, environmental conditions potentially  
670 affecting flight efficiency (wind speed) were identical for males and females. Thus, these

671 aspects are also unlikely to be of importance in snow petrels to explain sex-specific foraging  
672 habitat use during incubation.

673 Overall, our study demonstrates sex-specific foraging tactics in a highly sexually size  
674 dimorphic species during the incubation period, probably driven by intra-specific competition.  
675 Results indicate an absence of sexual segregation at a broad-spatial scale, but suggest that  
676 sexual segregation in snow petrels is mediated by habitat segregation at a microhabitat scale.  
677 Males foraged more intensively than females in high sea ice concentration areas, which  
678 seemed to be more profitable in terms of resource acquisition as results suggest that males ate  
679 more fish in these areas. Studying sex-specific foraging tactics during the entire breeding  
680 period, thus including the pre-laying exodus and the chick-rearing period, is however  
681 necessary to better understand the underlying drivers of sexual segregation in snow petrels  
682 and in marine predators in general (Pinet et al. 2012). Sexual segregation in foraging behavior  
683 may also vary between years as a function of environmental conditions (Cleasby et al. 2015,  
684 Paiva et al. 2017), highlighting the need for multi-year tracking studies.

685

## 686 **5 Acknowledgments**

687 The authors thank G. Brodin for his help in designing GPS loggers and extracting some GPS  
688 data, J. Vasseur who helped with deploying and recovering some GPS loggers and collecting  
689 tissue samples. The authors are grateful to the analytical Plateformes of the LIENSs  
690 laboratory for the access to their analytical facilities, and in particular to M. Brault-Favrou  
691 and G. Guillou for running stable isotope analyses. The work was supported financially and  
692 logistically by the French Polar Institute (IPEV program No. 109, PI H. Weimerskirch), the  
693 French Southern Territories administration (TAAF). This study is a contribution to program  
694 SENSEI funded by the BNP Paribas Foundation. The field study was approved by the IPEV  
695 ethics committee and Comité de l'Environnement Polaire. The IUF (Institut Universitaire de

696 France) is acknowledged for its support to PB as a Senior Member. We thank Dries Bonte and  
697 an anonymous reviewer for helpful suggestions on the manuscript.

698

## 699 **References**

- 700 Ainley D, Fraser W, Smith W, Hopkins T, Torres J (1991) The structure of upper level  
701 pelagic food webs in the Antarctic: effect of phytoplankton distribution. *J Marine*  
702 *Systems* 2:111–122
- 703 Ainley D, Fraser W, Sullivan C, Torres J, Hopkins T, Smith W (1986) Antarctic mesopelagic  
704 micronekton: evidence from seabirds that pack ice affects community structure.  
705 *Science* 232:847–849
- 706 Ainley DG, O'Connor EF, Boekelheide RJ (1984) The marine ecology of birds in the Ross  
707 Sea, Antarctica. *Ornithological Monographs* 32:1–97
- 708 Ainley DG, Ribic CA, Fraser WR (1992) Does prey preference affect habitat choice in  
709 Antarctic seabirds? *Mar Ecol Prog Ser* 90:207–221
- 710 Ainley DG, Ribic CA, Spear LB (1993) Species-habitat relationships among antarctic  
711 seabirds: a function of physical or biological factors? *The Condor* 95:806–816
- 712 Baduini CL, Hyrenbach KD (2003) Biogeography of procellariiform foraging strategies: does  
713 ocean productivity influence provisioning. *Mar Ornithol* 31:101–112
- 714 Barboza PS, Bowyer RT (2000) Sexual segregation in dimorphic deer: a new gastrocentric  
715 hypothesis. *Journal of Mammalogy* 81:473–489
- 716 Barbraud C (1999a) Subspecies-selective predation of snow petrels by skuas. *Oikos*:275–282
- 717 Barbraud C (1999b) Aspects écologiques et évolutifs de la variation de la taille corporelle  
718 chez le pétrel des neiges, *Pagodroma nivea*. Unpublished PhD Thesis, Université de  
719 Tours, France.
- 720 Barbraud C, Chastel O (1999) Early body condition and hatching success in the snow petrel  
721 *Pagodroma nivea*. *Polar Biol* 21:1–4
- 722 Barbraud C, Mariani A, Jouventin P (2000) Variation in call properties of the snow petrel,  
723 *Pagodroma nivea*, in relation to sex and body size. *Australian Journal of Zoology*  
724 48:421–430
- 725 Barbraud C, Weimerskirch H, Robertson GG, Jouventin P (1999) Size-related life history  
726 traits: insights from a study of snow petrels (*Pagodroma nivea*). *Journal of Animal*  
727 *Ecology* 68:1179–1192
- 728 Baylis A, Orben R, Costa D, Arnould J, Staniland I (2016) Sexual segregation in habitat use is  
729 smaller than expected in a highly dimorphic marine predator, the southern sea lion.  
730 *Marine Ecology Progress Series* 554:201–211

- 731 Bearhop S, Waldron S, Votier SC, Furness RW (2002) Factors that influence assimilation  
732 rates and fractionation of nitrogen and carbon stable isotopes in avian blood and  
733 feathers. *Physiological and Biochemical Zoology* 75:451–458
- 734 Beck J (1969) Breeding seasons and moult in some smaller Antarctic petrels. In: *Antarctic*  
735 *Ecology*, London.p 542–550
- 736 Beck J (1970) Breeding seasons and moult in some smaller Antarctic petrels. *Antarctic*  
737 *ecology* 1:542–550
- 738 Beier P (1987) Sex differences in quality of white-tailed deer diets. *Journal of Mammalogy*  
739 68:323–329
- 740 Benjamini Y, Hochberg Y (1995) Controlling the false discovery rate: a practical and  
741 powerful approach to multiple testing. *Journal of the Royal Statistical Society B*  
742 57:289-300
- 743 Breed GA, Bowen W, McMillan J, Leonard ML (2006) Sexual segregation of seasonal  
744 foraging habitats in a non-migratory marine mammal. *Proceedings of the Royal*  
745 *Society of London B: Biological Sciences* 273:2319–2326
- 746 Brown D (1966) Breeding biology of the Snow petrel *Pagodroma nivea* (Forster). *Anare*  
747 *Scientific Reports* 89:1–63
- 748 Calenge C, Dray S, Royer-Carenzi M (2009) The concept of animals' trajectories from a data  
749 analysis perspective. 4:34–41
- 750 Carravieri A, Cherel Y, Blévin P, Brault-Favrou M, Chastel O, Bustamante P (2014) Mercury  
751 exposure in a large subantarctic avian community. *Environmental Pollution* 190:51–57
- 752 Cavalieri D, Crawford J, Drinkwater M, Eppler D, Farmer L, Jentz R, Wackerman C (1991)  
753 Aircraft active and passive microwave validation of sea ice concentration from the  
754 Defense Meteorological Satellite Program Special Sensor Microwave Imager. *Journal*  
755 *of Geophysical Research: Oceans* 96:21989–22008
- 756 Ceia FR, Phillips RA, Ramos JA, Cherel Y, Vieira RP, Richard P, Xavier JC (2012) Short-  
757 and long-term consistency in the foraging niche of wandering albatrosses. *Marine*  
758 *biology* 159:1581–1591
- 759 Chastel O, Weimerskirch H, Jouventin P (1993) High annual variability in reproductive  
760 success and survival of an antarctic seabird, the snow petrel *Pagodroma nivea*.  
761 *Oecologia* 94:278–285
- 762 Chaurand T, Weimerskirch H (1994) Incubation routine, body mass regulation and egg  
763 neglect in the blue petrel *Halobaena caerulea*. *Ibis* 136:285–290
- 764 Cherel Y (2008) Isotopic niches of emperor and Adélie penguins in Adélie Land, Antarctica.  
765 *Marine Biology* 154:813–821
- 766 Cherel Y, Fontaine C, Richard P, Labat JP (2010) Isotopic niches and trophic levels of  
767 myctophid fishes and their predators in the Southern Ocean. *Limnology and*  
768 *Oceanography* 55:324–332

- 769 Chérel Y, Hobson KA (2007) Geographical variation in carbon stable isotope signatures of  
770 marine predators: a tool to investigate their foraging areas in the Southern Ocean. *Mar*  
771 *Ecol Prog Ser* 329:281–287
- 772 Chérel Y, Hobson KA, Bailleul F, Groscolas R (2005) Nutrition, physiology, and stable  
773 isotopes: new information from fasting and molting penguins. *Ecology* 86:2881–2888
- 774 Chérel Y, Hobson K, Weimerskirch H (2005) Using stable isotopes to study resource  
775 acquisition and allocation in procellariiform seabirds. *Oecologia* 145:533–540
- 776 Chérel Y, Koubbi P, Giraldo C, Penot F, Tavernier E, Moteki M, Ozouf-Costaz C, Causse R,  
777 Chartier A, Hosie G (2011) Isotopic niches of fishes in coastal, neritic and oceanic  
778 waters off Adélie Land, Antarctica. *Polar science* 5:286–297+
- 779 Chesson P (2000) Mechanisms of maintenance of species diversity. *Annual Review of*  
780 *Ecology and Ecosystems* 31:343–366
- 781 Clarke J, Manly B, Kerry KR, Gardner H, Franchi E, Corsolini S, Focardi S (1998) Sex  
782 differences in Adélie penguin foraging strategies. *Polar biology* 20:248–258
- 783 Cleasby IR, Wakefield ED, Bodey TW, Davies RD, Patrick SC, Newton J, Votier SC,  
784 Bearhop S, Hamer KC (2015) Sexual segregation in a wide-ranging marine predator is  
785 a consequence of habitat selection. *Mar Ecol Prog Ser* 518:1–12
- 786 Clutton-Brock T, Iason G, Guinness F (1987) Sexual segregation and density-related  
787 changes in habitat use in male and female Red deer (*Cervus elaphus*). *Journal of*  
788 *Zoology* 211:275–289
- 789 Conradt L (1998) Could asynchrony in activity between the sexes cause intersexual social  
790 segregation in ruminants? *Proceedings of the Royal Society of London B: Biological*  
791 *Sciences* 265:1359–1368
- 792 Conradt L (2005) Definitions, hypotheses, models and measures in the study of animal  
793 segregation. *Sexual segregation in vertebrates: ecology of the two sexes* (KE  
794 Ruckstuhl and P Neuhaus, eds) Cambridge University Press, Cambridge, United  
795 Kingdom:11–34
- 796 Croxall J (1982) Sexual dimorphism in Snow petrels *Pagodroma nivea*. *Notornis* 29:171–180
- 797 Croxall JP, Steele WK, McInnes SJ, Prince PA (1995) Breeding distribution of the snow  
798 petrel *Pagodroma nivea*. *Marine Ornithology* 23:69–99
- 799 Delord K, Pinet P, Pinaud D, Barbraud C, Grissac S de, Lewden A, Chérel Y, Weimerskirch  
800 H (2016) Species-specific foraging strategies and segregation mechanisms of  
801 sympatric Antarctic fulmarine petrels throughout the annual cycle. *Ibis* 158:569–586
- 802 Elliott KH, Gaston AJ, Crump D (2010) Sex-specific behavior by a monomorphic seabird  
803 represents risk partitioning. *Behavioral Ecology* 21:1024–1032
- 804 Fairbairn J, Shine R (1993) Patterns of sexual size dimorphism in seabirds of the southern  
805 hemisphere. *Oikos* 68:139–145

- 806 Ferretti V, Soave GE, Casaux R, Coria NR (2001) Diet of the Snow Petrel *Pagodroma nivea*  
807 at Laurie Island, Antarctica, during the 1997/98 breeding season. *Marine Ornithology*  
808 29:71–73
- 809 Fieberg J, Kochanny CO (2005) Quantifying home-range overlap: the importance of the  
810 utilization distribution. *Journal of wildlife management* 69:1346–1359
- 811 Field SA, Tyre AJ, Jonzen N, Rhodes JR, Possingham HP (2004) Minimizing the cost of  
812 environmental management decisions by optimizing statistical thresholds. *Ecology*  
813 *Letters* 7:669–675
- 814 Giraldo C, Cherel Y, Vallet C, Mayzaud P, Tavernier E, Moteki M, Hosie G, Koubbi P (2011)  
815 Ontogenic changes in the feeding ecology of the early life stages of the Antarctic  
816 silverfish (*Pleuragramma antarcticum*) documented by stable isotopes and diet  
817 analysis in the Dumont d’Urville Sea (East Antarctica). *Polar Science* 5:252–263
- 818 Gonzáles-Solís J, Croxall J, Wood A (2000) Sexual dimorphism and sexual segregation in  
819 foraging strategies of northern giant petrels *Macronectes halli* during incubation.  
820 *Oikos* 90:390–398
- 821 Griffiths A (1983) Factors affecting the distribution of the Snow Petrel (*Pagodroma nivea*)  
822 and the Antarctic Petrel (*Thalassoica antarctica*). *Ardea* 71:145–150
- 823 Gross JE (1998) Sexual segregation in ungulates: a comment. *Journal of Mammalogy*  
824 79:1404–1409
- 825 Guillotin M, Jouventin P (1980) Le Pétrel des Neiges à Pointe Géologie. *Gerfaut* 70:51–72
- 826 Harder LD, Barrett SC, Cole WW (2000) The mating consequences of sexual segregation  
827 within inflorescences of flowering plants. *Proceedings of the Royal Society of London*  
828 *B: Biological Sciences* 267:315–320
- 829 Harper PC, Croxall JP, Cooper J (1985) A guide to foraging methods used by marine birds in  
830 antarctic and subantarctic seas. *Biomass Handbook* 24:1–22
- 831 Hastie TJ, Tibshirani RJ (1990) Generalized additive models, volume 43 of *Monographs on*  
832 *Statistics and Applied Probability*.
- 833 Hennicke JC, James DJ, Weimerskirch H (2015) Sex-specific habitat utilization and  
834 differential breeding investments in Christmas Island frigatebirds throughout the  
835 breeding cycle. *PloS one* 10:e0129437
- 836 Hijmans R (2018) raster: Geographic Data Analysis and Modeling. R package version 2.6-7.
- 837 Hobson KA, Clark RG (1992) Assessing avian diets using stable isotopes I: turnover of <sup>13</sup>C in  
838 tissues. *The Condor* 94:181–188
- 839 Hobson KA, Clark RG (1993) Turnover of <sup>13</sup>C in cellular and plasma fractions of blood:  
840 implications for non destructive sampling in avian dietary studies. *The Auk* 110:638–  
841 641



- 842 Hochkirch A, Gröning J, Krause S (2007) Intersexual niche segregation in Cepero's Ground-  
843 hopper, *Tetrix ceperoi*. *Evolutionary Ecology* 21:727–738
- 844 Hodum PJ, Hobson KA (2000) Trophic relationships among Antarctic fulmarine petrels:  
845 insights into dietary overlap and chick provisioning strategies inferred from stable-  
846 isotope ( $\delta$  N-15 and  $\delta$  C-13) analyses. *Mar Ecol Prog Ser* 198:273–281
- 847 Isenmann P (1970) Contribution à la biologie de reproduction du pétrel des neiges  
848 (*Pagodroma nivea* Forster). Le problème de la petite et de la grande forme.
- 849 Jackson AL, Inger R, Parnell AC, Bearhop S (2011) Comparing isotopic niche widths among  
850 and within communities: SIBER—Stable Isotope Bayesian Ellipses in R. *Journal of*  
851 *Animal Ecology* 80:595–602
- 852 Jaeger A, Connan M, Richard P, Cherel Y (2010) Use of stable isotopes to quantify seasonal  
853 changes of trophic niche and levels of population and individual specialisation in  
854 seabirds. *Mar Ecol Prog Ser* 401:269–277
- 855 Jeltsch F, Bonte D, Pe'er G, Reineking B, Leimgruber P, Balkenhol N, Schröder B, Buchman  
856 CM, Mueller T, Blaum N, Zurell D, Böhning-Gaese K, Wiegand T, Eccard JA, Hofer  
857 H, Reeg J, Eggers U, Bauer S (2013) Integrating movement ecology with biodiversity  
858 research - exploring new avenues to address spatiotemporal biodiversity dynamics.  
859 *Movement Ecology* 1:6
- 860 Kernaléguen L, Arnould J, Guinet C, Cazelles B, Richard P, Cherel Y (2016) Early-life sexual  
861 segregation: ontogeny of isotopic niche differentiation in the Antarctic fur seal.  
862 *Scientific reports* 6:33211
- 863 Lewis S, Benvenuti S, Dall–Antonia L, Griffiths R, Money L, Sherratt T, Wanless S, Hamer  
864 K (2002) Sex-specific foraging behaviour in a monomorphic seabird. *Proceedings of*  
865 *the Royal Society of London B: Biological Sciences* 269:1687–1693
- 866 Maher WJ (1962) Breeding biology of the snow petrel near Cape Hallett, Antarctica. *The*  
867 *Condor* 64:488–499
- 868 Main MB, Weckerly FW, Bleich VC (1996) Sexual segregation in ungulates: new directions  
869 for research. *Journal of Mammalogy* 77:449–461
- 870 Mancini P, Bond A, Hobson K, Duarte L, Bugoni L (2013) Does sexual size dimorphism  
871 facilitate trophic segregation? Testing the intersexual competition hypothesis with  
872 tropical and polar seabirds. *Journal of Experimental Marine Biology and Ecology*  
873 449:186–193
- 874 Martin A, Da Silva V (2004) River dolphins and flooded forest: seasonal habitat use and  
875 sexual segregation of botos (*Inia geoffrensis*) in an extreme cetacean environment.  
876 *Journal of zoology* 263:295–305
- 877 Mougín J (1968) Etude écologique de quatre espèces de pétrels antarctiques. *L'Oiseau et R F*  
878 *O* 38:1–52

- 879 Neuhaus P, Ruckstuhl KE (2004) A Critique: Can the Activity Budget Hypothesis Explain  
880 Sexual Segregation in Desert Bighorn Sheep? *Behaviour*:513–520
- 881 Paiva VH, Pereira J, Ceia FR, Ramos JA (2017) Environmentally driven sexual segregation in  
882 a marine top predator. *Scientific reports* 7:2590
- 883 Parnell AC, Inger R, Bearhop S, Jackson AL (2010) Source partitioning using stable isotopes:  
884 coping with too much variation. *PloS one* 5:e9672
- 885 Peig J, Green AJ (2009) New perspectives for estimating body condition from mass/length  
886 data: the scaled mass index as an alternative method. *Oikos* 118:1883–1891
- 887 Peig J, Green AJ (2010) The paradigm of body condition: a critical reappraisal of current  
888 methods based on mass and length: The paradigm of body condition. *Functional*  
889 *Ecology* 24:1323–1332
- 890 Pereira JM, Paiva VH, Phillips RA, Xavier JC (2018) The devil is in the detail: small-scale  
891 sexual segregation despite large-scale spatial overlap in the wandering albatross.  
892 *Marine Biology* 165:55
- 893 Phillips RA, McGill RAR, Dawson DA, Bearhop S (2011) Sexual segregation in distribution,  
894 diet and trophic level of seabirds: insights from stable isotope analysis. *Marine*  
895 *Biology* 158:2199–2208
- 896 Phillips RA, Silk JRD, Phalan B, Cattry P, Croxall JP (2004) Seasonal sexual segregation in  
897 two *Thalassarche* albatross species: competitive exclusion, reproductive role  
898 specialization or foraging niche divergence? *Proceedings of the Royal Society of*  
899 *London Series B: Biological Sciences* 271:1283–1291
- 900 Phillips RA, Wakefield ED, Croxall JP, Fukuda A, Higuchi H (2009) Albatross foraging  
901 behaviour: no evidence for dual foraging, and limited support for anticipatory  
902 regulation of provisioning at South Georgia. *Marine Ecology Progress Series*  
903 391:279–292
- 904 Phillips RA, Xavier JC, Croxall JP, Burger AE (2003) Effects of satellite transmitters on  
905 albatrosses and petrels. *The Auk* 120:1082–1090
- 906 Pinet P, Jaquemet S, Phillips RA, Le Corre M (2012) Sex-specific foraging strategies  
907 throughout the breeding season in a tropical, sexually monomorphic small petrel.  
908 *Animal Behaviour* 83:979–989
- 909 Pinkerton M, Forman J, Bury S, Brown J, Horn P, O’Driscoll R (2013) Diet and trophic niche  
910 of Antarctic silverfish *Pleuragramma antarcticum* in the Ross Sea, Antarctica. *Journal*  
911 *of fish biology* 82:141–164
- 912 R Development Core Team 2015. R: A language and environment for statistical computing.  
913 Vienna: R Foundation for statistical computing, <https://www.R-project.org>
- 914 Rau GH, Ainley DG, Bengtson JL, Torres JJ, Hopkins TL (1992)  $^{15}\text{N}/^{14}\text{N}$  and  $^{13}\text{C}/^{12}\text{C}$  in  
915 Weddell Sea birds, seals, and fish: implications for diet and trophic structure. *Marine*  
916 *Ecology Progress Series*:1–8

- 917 Rayner N, Parker DE, Horton E, Folland C, Alexander L, Rowell D, Kent E, Kaplan A (2003)  
918 Global analyses of sea surface temperature, sea ice, and night marine air temperature  
919 since the late nineteenth century. *Journal of Geophysical Research: Atmospheres* 108
- 920 Ridoux V, Offredo C (1989) The diets of five summer breeding seabirds in Adélie Land,  
921 Antarctica. *Polar biology* 9:137–145
- 922 Roback PJ, Askins RA (2005) Judicious use of multiple hypothesis tests. *Conservation*  
923 *Biology* 19:261-267
- 924 Romey WL, Wallace AC (2007) Sex and the selfish herd: sexual segregation within  
925 nonmating whirligig groups. *Behavioral Ecology* 18:910–915
- 926 Ruckstuhl K (2007) Sexual segregation in vertebrates: proximate and ultimate causes.  
927 *Integrative and Comparative Biology* 47:245–257
- 928 Ruckstuhl K, Neuhaus P (2005) Sexual segregation in vertebrates: ecology of the two sexes.  
929 1st edn. Cambridge: Cambridge University Press
- 930 Selander RK (1966) Sexual dimorphism and differential niche utilization in birds. *The Condor*  
931 68:113–151
- 932 Shaffer SA, Costa D, Weimerskirch H (2001) Behavioural factors affecting foraging effort of  
933 breeding wandering albatrosses. *Journal of animal ecology* 70:864–874
- 934 Shine R (1989) Ecological causes for the evolution of sexual dimorphism: a review of the  
935 evidence. *The Quarterly Review of Biology* 64:419–461
- 936 Sims DW (2005) Differences in habitat selection and reproductive strategies of male and  
937 female sharks. *Sexual segregation in vertebrates: Ecology of the two sexes* 8:127–147
- 938 Spear LB, Ainley DG (1998) Morphological differences relative to ecological segregation in  
939 petrels (Family: Procellariidae) of the Southern Ocean and tropical Pacific. *The*  
940 *Auk*:1017–1033
- 941 Tartu S, Bustamante P, Goutte A, Cherel Y, Weimerskirch H, Bustnes JO, Chastel O (2014)  
942 Age-Related Mercury Contamination and Relationship with Luteinizing Hormone in a  
943 Long-Lived Antarctic Bird. *Plos One* 9
- 944 Thaxter CB, Daunt F, Hamer KC, Watanuki Y, Harris MP, Grémillet D, Peters G, Wanless S  
945 (2009) Sex-specific food provisioning in a monomorphic seabird, the common  
946 guillemot *Uria aalge*: nest defence, foraging efficiency or parental effort? *Journal of*  
947 *Avian Biology* 40:75–84
- 948 Tveraa T, Lorensten S-H, Sæther B-E (1997) Regulation of foraging trips and costs of  
949 incubation shifts in the Antarctic petrel (*Thalassoica antarctica*). *Behavioral Ecology*  
950 8:465–469
- 951 Van Franeker J, Williams R (1992) Diet of fulmarine petrels in the Windmill Islands, Wilkes  
952 Land, Antarctica. Preliminary results.

- 953 Votier SC, Bearhop S, Witt MJ, Inger R, Thompson DR, Newton J (2010) Individual  
954 responses of seabirds to commercial fisheries revealed using GPS tracking, stable  
955 isotopes and vessel monitoring systems. *Journal of applied ecology* 47:487–497
- 956 Wakefield ED, Phillips RA, Matthiopoulos J, Fukuda A, Higuchi H, Marshall GJ, Trathan PN  
957 (2009) Wind field and sex constrain the flight speeds of central-place foraging  
958 albatrosses. *Ecological Monographs* 79:663–679
- 959 Wearmouth VJ, Sims DW (2008) Sexual segregation in marine fish, reptiles, birds and  
960 mammals: behaviour patterns, mechanisms and conservation implications. *Advances*  
961 *in marine biology* 54:107–170
- 962 Weimerskirch H (2007) Are seabirds foraging for unpredictable resources? *Deep Sea*  
963 *Research Part II: Topical Studies in Oceanography* 54:211–223
- 964 Weimerskirch H, Lallemand J, Martin J (2005) Population sex ratio variation in a  
965 monogamous long-lived bird, the wandering albatross. *Journal of Animal Ecology*  
966 74:285–291
- 967 Weimerskirch H, Mougey T, Hindermayer X (1997) Foraging and provisioning strategies of  
968 black-browed albatrosses in relation to the requirements of the chick: natural variation  
969 and experimental study. *Behavioral ecology* 8:635–643
- 970 Weimerskirch H, Salamolard M, Sarrazin F, Jouventin P (1993) Foraging strategy of  
971 wandering albatrosses through the breeding season: a study using satellite telemetry.  
972 *The Auk* 110:325–342
- 973 Weimerskirch H, Shaffer SA, Tremblay Y, Costa DP, Gadenne H, Kato A, Ropert-Coudert Y,  
974 Sato K, Aurioules D (2009) Species- and sex-specific differences in foraging behaviour  
975 and foraging zones in blue-footed and brown boobies in the Gulf of California. *Marine*  
976 *Ecology Progress Series* 391:267–278
- 977 Widmann M, Kato A, Raymond B, Angelier F, Arthur B, Chastel O, Pellé M, Raclot T,  
978 Ropert-Coudert Y (2015) Habitat use and sex-specific foraging behaviour of Adélie  
979 penguins throughout the breeding season in Adélie Land, East Antarctica. *Movement*  
980 *ecology* 3:30
- 981 Wood S, Scheipl F, Wood MS (2017) Package ‘*gamm4*.’ *Am Stat* 45:339
- 982 Worton BJ (1989) Kernel methods for estimating the utilization distribution in home-range  
983 studies. *Ecology* 70:164–168
- 984 Yoccoz NG (1991) Overuse, and misuse of significance tests in evolutionary biology and  
985 ecology. *Bulletin of the Ecological Society of America* 72:106–111
- 986
- 987
- 988
- 989

990 Table 1. Body measurements of male and female snow petrels and percentage of difference  
 991 between sexes for each measurement. For t-tests homogeneity of variances we checked using  
 992 a Brown and Forsythe tests (Brown and Forsythe 1974), and corrected p values are reported  
 993 (uncorrected in brackets). Significant differences with a false detection rate of 0.10 are shown  
 994 in bold.  $\Delta$  is the difference in %. The sample size is 47 individuals.

|                            | Sex    | Mean (SD)    | Range       | $\Delta$ | t-test                                  |
|----------------------------|--------|--------------|-------------|----------|-----------------------------------------|
| Wing length (mm)           | Male   | 298.3 (6.8)  | 287.0-311.0 | 2.3      | <b><math>t_{45}=4.215</math></b>        |
|                            | Female | 290.0 (6.7)  | 280.0-302.0 |          | <b><math>p&lt;0.001</math></b> (<0.001) |
| Tarsus length (mm)         | Male   | 40.2 (1.2)   | 38.0-42.7   | 4.5      | <b><math>t_{45}=4.846</math></b>        |
|                            | Female | 38.4 (1.2)   | 35.9-41.0   |          | <b><math>p&lt;0.001</math></b> (<0.001) |
| Bill length (mm)           | Male   | 24.4 (1.0)   | 22.1-26.6   | 9.0      | <b><math>t_{45}=8.488</math></b>        |
|                            | Female | 22.2 (0.8)   | 20.9-23.7   |          | <b><math>p&lt;0.001</math></b> (<0.001) |
| Bill depth (mm)            | Male   | 10.8 (0.5)   | 9.6-11.8    | 8.3      | <b><math>t_{45}=6.408</math></b>        |
|                            | Female | 9.9 (0.4)    | 8.9-10.9    |          | <b><math>p&lt;0.001</math></b> (<0.001) |
| Body mass <sup>1</sup> (g) | Male   | 389.0 (30.4) | 331.5-464.0 | 10.3     | <b><math>t_{45}=6.014</math></b>        |
|                            | Female | 340.5 (24.0) | 300.0-385.0 |          | <b><math>p&lt;0.001</math></b> (<0.001) |
| Body mass <sup>2</sup> (g) | Male   | 431.4 (34.0) | 365.0-495.0 | 10.3     | <b><math>t_{45}=4.467</math></b>        |
|                            | Female | 387.0 (33.9) | 320.0-460.0 |          | <b><math>p&lt;0.001</math></b> (<0.001) |

995 <sup>1</sup>before a foraging trip; <sup>2</sup>on return from a foraging trip.

996

997

998

999

1000

1001

1002

1003

1004

1005

1006

1007

1008

1009 Table 2. Estimated overlap in utilization distributions (UD) between male and female snow  
1010 petrels from Ile des Pétrels, Adélie Land, East Antarctica. UDOI: Utilization distribution  
1011 overlap index. BA: Bhattacharyya's affinity

| UD (%) | Observed UDOI | Randomized UDOI | p     | Observed BA | Randomized BA | p     |
|--------|---------------|-----------------|-------|-------------|---------------|-------|
| 25     | 0.062         | 0.064           | 0.417 | 0.127       | 0.123         | 0.452 |
| 50     | 0.226         | 0.243           | 0.262 | 0.379       | 0.398         | 0.273 |
| 75     | 0.502         | 0.545           | 0.227 | 0.634       | 0.662         | 0.212 |
| 95     | 1.215         | 1.229           | 0.439 | 0.858       | 0.863         | 0.359 |

1012

1013

1014

1015

1016

1017

1018

1019

1020

1021

1022

1023

1024

1025

1026

1027

1028

1029

1030

1031 Table 3. Mean, maximum and variance in sea ice concentration, mean, minimum and  
 1032 maximum bathymetry for foraging localities of male and female snow petrels from Ile des  
 1033 Pétrels, Adélie Land, East Antarctica. For t-tests homogeneity of variances we checked using  
 1034 a Brown and Forsythe tests (Brown and Forsythe 1974), corrected p values are reported  
 1035 (uncorrected in brackets). Significant differences with a false detection rate of 0.10 are shown  
 1036 in bold.

|                        | Sex    | Mean (SD)      | Range      | t-test                      |
|------------------------|--------|----------------|------------|-----------------------------|
| Mean SIC (%)           | Male   | 54.8 (14.6)    | 30.4-77.9  | <b>t<sub>44</sub>=2.600</b> |
|                        | Female | 44.0 (13.4)    | 16.8-72.5  | <b>p=0.063</b> (0.013)      |
| Maximum SIC (%)        | Male   | 83.8 (16.8)    | 43.9-99.9  | t <sub>44</sub> =1.867      |
|                        | Female | 72.6 (23.8)    | 19.8-100.0 | p=0.171 (0.069)             |
| Variance in SIC        | Male   | 375.7 (224.2)  | 69.5-840.2 | t <sub>44</sub> =1.772      |
|                        | Female | 264.0 (198.3)  | 3.9-749.9  | p=0.139 (0.083)             |
| Mean bathymetry (m)    | Male   | 503.8 (248.7)  | 285-1490   | t <sub>45</sub> =0.911      |
|                        | Female | 582.4 (341.2)  | 259-1706   | p=0.367 (0.367)             |
| Maximum bathymetry (m) | Male   | 1354.1 (632.1) | 809-2973   | t <sub>45</sub> =1.285      |
|                        | Female | 1617.4 (771.4) | 613-3223   | p=0.257 (0.205)             |

1037

1038

1039

1040

1041

1042

1043

1044

1045

1046

1047

1048

1049

1050

1051 Table 4. Generalized Additive Mixed Model (GAMM) results for foraging probability of male  
 1052 and female snow petrels as a function of sea ice concentration (SIC), bathymetry (BAT) and  
 1053 spatial autocorrelation (s(x,y)). edf indicates the estimated degrees of freedom.

| Variable                     | Sex    | Smoother edf (p value)   | Estimate (SE) | $\sigma^2$ (SE) |
|------------------------------|--------|--------------------------|---------------|-----------------|
| Intercept                    | Male   |                          | 3.543 (1.101) |                 |
|                              | Female |                          | 3.087 (1.365) |                 |
| SIC                          | Male   | <b>7.97 (&lt;0.001)</b>  |               |                 |
|                              | Female | <b>1.00 (0.003)</b>      |               |                 |
| BAT                          | Male   | <b>3.89 (&lt;0.001)</b>  |               |                 |
|                              | Female | <b>1.00 (0.044)</b>      |               |                 |
| s(x,y)                       | Male   | <b>22.96 (&lt;0.001)</b> |               |                 |
|                              | Female | <b>24.52 (&lt;0.001)</b> |               |                 |
| Random intercept for bird ID | Male   |                          |               | 10.250 (3.201)  |
|                              | Female |                          |               | 1.174 (0.343)   |

1054  
 1055  
 1056  
 1057  
 1058  
 1059  
 1060  
 1061  
 1062  
 1063  
 1064  
 1065  
 1066  
 1067  
 1068



1069 Table 5. Generalized Additive Model (GAM) results for foraging intensity of male and female  
1070 snow petrels as a function of sea ice concentration (SIC) and bathymetry (BAT). edf indicates  
1071 the estimated degrees of freedom.

| Variable | Sex    | Smoother edf (p value)  | Scale | Adjusted R <sup>2</sup> |
|----------|--------|-------------------------|-------|-------------------------|
| SIC      | Male   | <b>4.99 (&lt;0.001)</b> | 2.50  | 0.223                   |
|          | Female | <b>4.11 (&lt;0.001)</b> | 2.25  | 0.663                   |
| BAT      | Male   | <b>6.47 (&lt;0.001)</b> | 16.01 | 0.779                   |
|          | Female | <b>6.82 (&lt;0.001)</b> | 9.28  | 0.863                   |

1072

1073

1074

1075

1076

1077

1078

1079

1080

1081

1082

1083

1084

1085

1086

1087

1088

1089

1090

1091 Table 6. Stable isotope values in blood cells, plasma and feathers of male and female snow petrels sampled Ile des Pétrels, Adélie Land, East  
 1092 Antarctica. Values are mean  $\pm$  SD. SEA<sub>B</sub> are Bayesian approximation of the standard ellipse area. Values in brackets indicate n and range for  
 1093  $\delta^{13}\text{C}$  and  $\delta^{15}\text{N}$ , and 95% credible interval for SEA<sub>B</sub>. p indicates the probability that SEA<sub>B</sub> of males and females differ. Sample sizes are 47  
 1094 individuals for blood cells and feathers, and 46 individuals for plasma. For t-tests homogeneity of variances we checked using a Brown and  
 1095 Forsythe tests (Brown and Forsythe 1974), corrected p values are reported (uncorrected in brackets). Significant differences with a false detection  
 1096 rate of 0.10 are shown in bold.

| Tissue      | $\delta^{13}\text{C}(\text{‰})$      |                                      |                                                          | $\delta^{15}\text{N}(\text{‰})$   |                                  |                                                              | SEA <sub>B</sub>    |                     | p     |
|-------------|--------------------------------------|--------------------------------------|----------------------------------------------------------|-----------------------------------|----------------------------------|--------------------------------------------------------------|---------------------|---------------------|-------|
|             | Male                                 | Female                               |                                                          | Male                              | Female                           |                                                              | Male                | Female              |       |
| Plasma      | -25.46 $\pm$ 0.35<br>(-26.01;-24.56) | -25.66 $\pm$ 0.22<br>(-26.06;-25.26) | <b>t<sub>83</sub>=2.105</b><br><b>p=0.057</b><br>(0.039) | 12.11 $\pm$ 0.74<br>(10.70;13.38) | 11.49 $\pm$ 0.97<br>(9.04;12.83) | <b>t<sub>83</sub>=3.418</b><br><b>p=0.002</b><br>(0.001)     | 0.69<br>(0.45;0.99) | 0.79<br>(0.55;1.09) | 0.311 |
| Blood cells | -25.79 $\pm$ 0.21<br>(-26.13;-25.35) | -25.72 $\pm$ 0.27<br>(-26.13;-25.19) | t <sub>83</sub> =1.491<br>p=0.168<br>(0.140)             | 10.65 $\pm$ 0.68<br>(9.37;12.17)  | 9.96 $\pm$ 0.65<br>(8.36;11.46)  | <b>t<sub>83</sub>=5.568</b><br><b>p&lt;0.001</b><br>(<0.001) | 0.41<br>(0.29;0.55) | 0.39<br>(0.29;0.52) | 0.586 |
| Feather     | -23.68 $\pm$ 0.71<br>(-25.05;-22.06) | -23.50 $\pm$ 0.67<br>(-25.00;-22.49) | t <sub>83</sub> =0.335<br>p=0.738<br>(0.738)             | 12.11 $\pm$ 1.35<br>(8.75;14.03)  | 11.34 $\pm$ 1.35<br>(8.61;14.10) | <b>t<sub>83</sub>=4.289</b><br><b>p&lt;0.001</b><br>(<0.001) | 2.41<br>(1.72;3.28) | 2.65<br>(1.94;3.49) | 0.331 |

1097

1098 Table 7. Summary of foraging trip metrics for snow petrels from Ile des Pétreils, Adélie Land,  
 1099 East Antarctica. For t-tests homogeneity of variances we checked using a Brown and Forsythe  
 1100 tests (Brown and Forsythe 1974), corrected p values are reported (uncorrected in brackets).  
 1101 Significant differences with a false detection rate of 0.10 are shown in bold.

|                                          | Sex    | Mean (SD)     | Range        | t-test            |
|------------------------------------------|--------|---------------|--------------|-------------------|
| Trip duration (d)                        | Male   | 5.2 (1.8)     | 1.1-8.0      | $t_{45}=0.979$    |
|                                          | Female | 4.8 (1.9)     | 0.7-8.0      | $p=1.160$ (0.333) |
| Trip length (km)                         | Male   | 851.6 (352.1) | 302.0-1957.5 | $t_{45}=0.292$    |
|                                          | Female | 856.4 (389.0) | 173.8-1803.8 | $p=0.772$ (0.772) |
| Trip mean speed (km·h <sup>-1</sup> )    | Male   | 2.0 (0.6)     | 1.2-3.5      | $t_{45}=0.762$    |
|                                          | Female | 2.1 (0.4)     | 1.7-3.2      | $p=0.788$ (0.450) |
| Trip maximum speed (km·h <sup>-1</sup> ) | Male   | 13.5 (2.6)    | 9.2-21.4     | $t_{45}=0.670$    |
|                                          | Female | 13.3 (2.5)    | 9.5-18.9     | $p=0.709$ (0.506) |
| Trip start direction (°)                 | Male   | 161.5 (114.0) | 0.8-355.2    | $t_{45}=1.066$    |
|                                          | Female | 204.6 (143.2) | 2.6-348.6    | $p=2.045$ (0.292) |
| Trip mean direction (°)                  | Male   | 190.9 (110.4) | 70.1-307.9   | $t_{45}=0.336$    |
|                                          | Female | 209.2 (117.6) | 68.8-342.7   | $p=0.862$ (0.739) |
| Trip end direction (°)                   | Male   | 167.5 (114.0) | 46.9-282.8   | $t_{45}=0.773$    |
|                                          | Female | 184.8 (68.6)  | 102.9-291.6  | $p=1.035$ (0.444) |

1102

1103

1104

1105

1106

1107

1108

1109

1110

1111

1112

1113

1114

1115

1116 Table 8. Summary of metrics of foraging trip efficiency for snow petrels from Ile des Pétrels,  
 1117 Adélie Land, East Antarctica. For t-tests homogeneity of variances we checked using a Brown  
 1118 and Forsythe tests (Brown and Forsythe 1974), corrected p values are reported (uncorrected in  
 1119 brackets). Significant differences with a false detection rate of 0.10 are shown in bold.

|                                        | Sex    | Mean (SD)    | Range       | t-test                      |
|----------------------------------------|--------|--------------|-------------|-----------------------------|
| Mass at departure (g)                  | Male   | 389.0 (30.4) | 331.5-464.0 | <b>t<sub>45</sub>=6.014</b> |
|                                        | Female | 340.5 (24.0) | 300.0-385.0 | <b>p&lt;0.001</b> (<0.001)  |
| Mass at return (g)                     | Male   | 431.4 (34.0) | 365.0-495.0 | <b>t<sub>45</sub>=4.467</b> |
|                                        | Female | 387.0 (33.9) | 320.0-460.0 | <b>p&lt;0.001</b> (<0.001)  |
| BCI <sup>1</sup> at departure          | Male   | 377.1 (25.2) | 336.2-437.7 | <b>t<sub>45</sub>=2.633</b> |
|                                        | Female | 358.1 (24.0) | 321.3-414.1 | <b>p=0.031</b> (0.012)      |
| BCI at return                          | Male   | 419.5 (31.2) | 372.5-479.3 | t <sub>45</sub> =1.636      |
|                                        | Female | 405.0 (29.3) | 361.0-458.4 | p=0.145 (0.109)             |
| Δmass (g)                              | Male   | 42.4 (38.1)  | -20-110     | t <sub>45</sub> =0.392      |
|                                        | Female | 46.6 (34.6)  | -10-95      | p=0.697 (0.697)             |
| Daily mass gain (g·day <sup>-1</sup> ) | Male   | 9.2 (8.2)    | -4.2-28.0   | t <sub>45</sub> =1.707      |
|                                        | Female | 14.6 (13.2)  | -2.0-45.0   | p=0.152 (0.095)             |
| Proportion mass gain (%)               | Male   | 0.11 (0.10)  | -0.05-0.29  | t <sub>45</sub> =0.886      |
|                                        | Female | 0.14 (0.11)  | -0.03-0.31  | p=0.435 (0.381)             |
| Proportion daily mass gain (%)         | Male   | 0.02 (0.02)  | -0.01-0.07  | <b>t<sub>45</sub>=2.064</b> |
|                                        | Female | 0.04 (0.04)  | -0.01-0.12  | <b>p=0.089</b> (0.045)      |

1120 <sup>1</sup> Body Condition Index

1121

1122

1123

1124

1125

1126

1127

1128

1129

1130

1131

1132

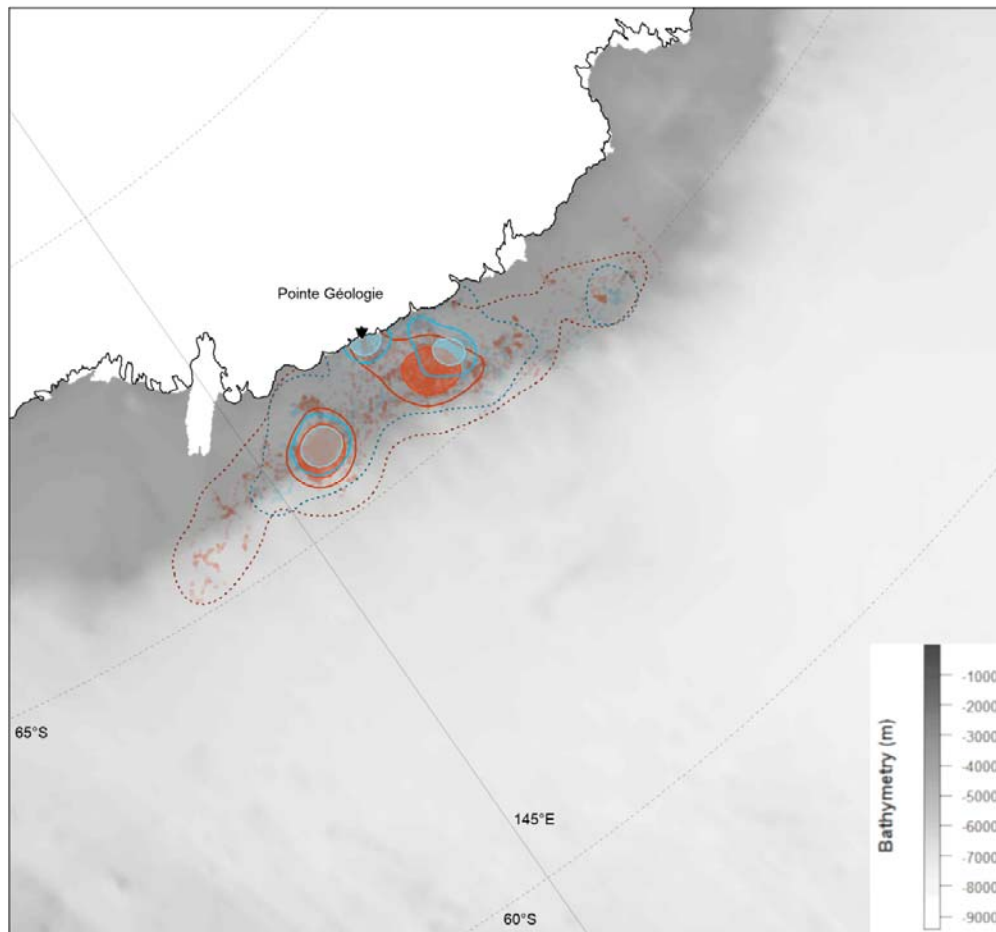

1133  
1134 Figure 1. Foraging ranges of male (blue) and female (red) snow petrels during incubation  
1135 sampled at Ile des Pétrels, Adélie Land, East Antarctica. Dots show raw location data. Kernel  
1136 density based utilization distributions at 95% (dotted lines), 50% (solid lines) and 25% (filled  
1137 areas). Bathymetry shown in grey and land in white. Ile des Pétrels is shown as a black  
1138 triangle.

1139

1140

1141

1142

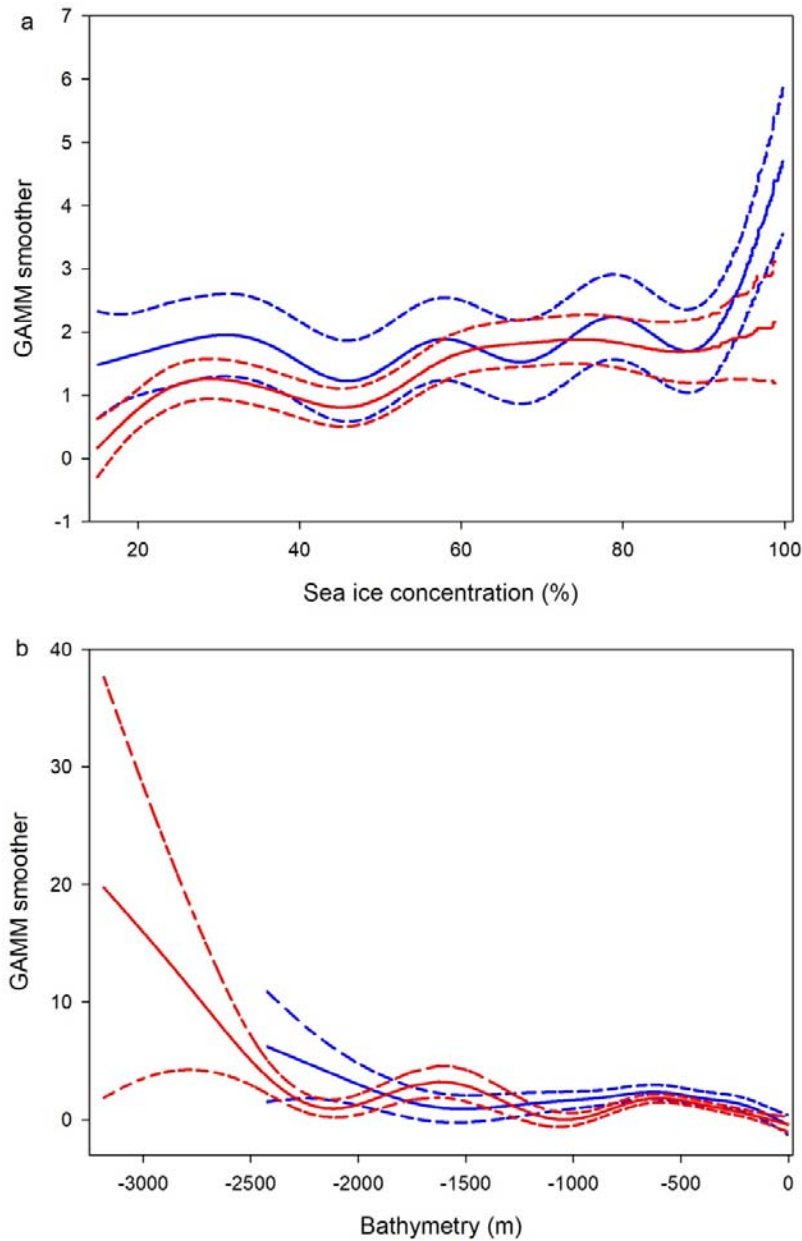

1143

1144 Figure 2. Foraging probability habitat selection functions for (a) sea ice concentration and (b)  
1145 bathymetry). Plots show the predicted curve from the model (solid line) and 95% confidence  
1146 intervals (dashed lines) for male (blue) and female (red) snow petrels sampled at Ile des  
1147 Pétrels, Adélie Land, East Antarctica. GAMM: generalized additive mixed model.

1148

1149

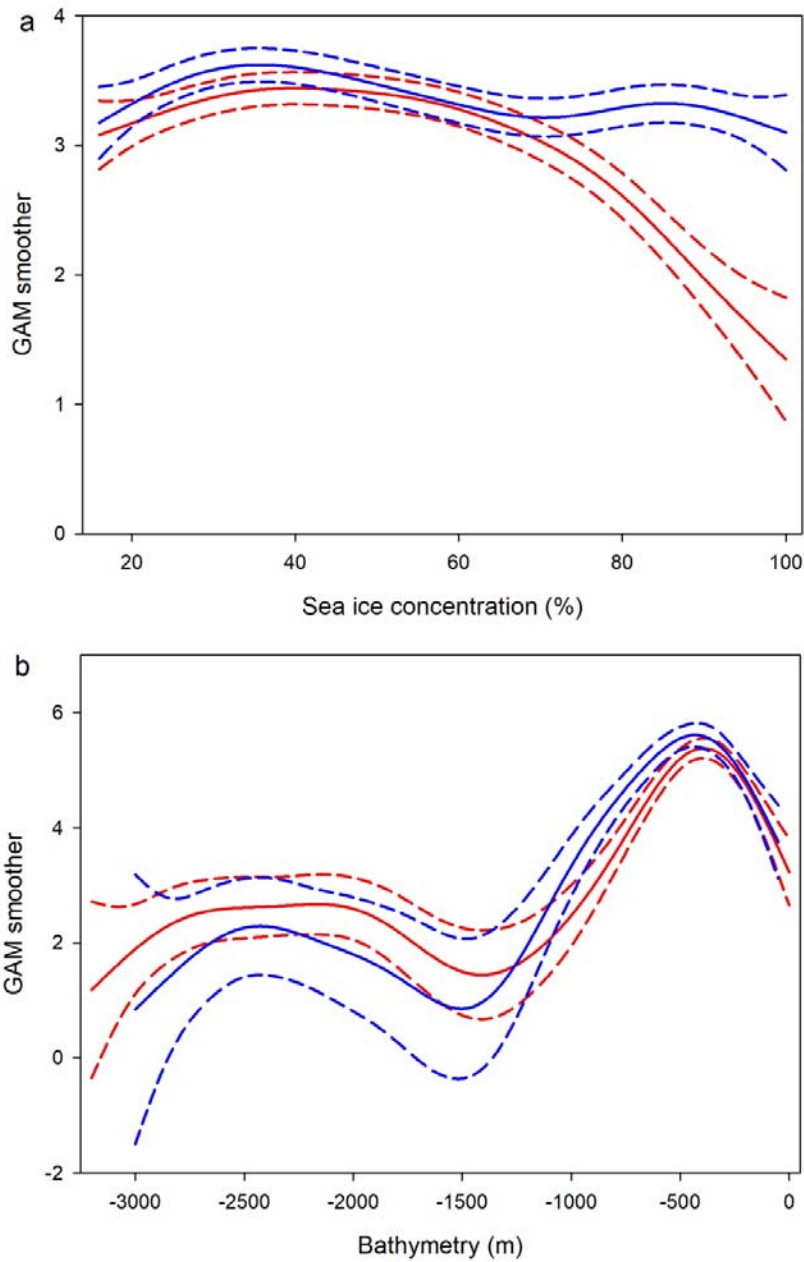

1150

1151 Figure 3. Foraging intensity habitat selection functions for (a) sea ice concentration and (b)  
1152 bathymetry). Plots show the predicted curve from the model (solid line) and 95% confidence  
1153 intervals (dashed lines) for male (blue) and female (red) snow petrels sampled at Ile des  
1154 Pétrels, Adélie Land, East Antarctica. GAM: generalized additive model.

1155

1156

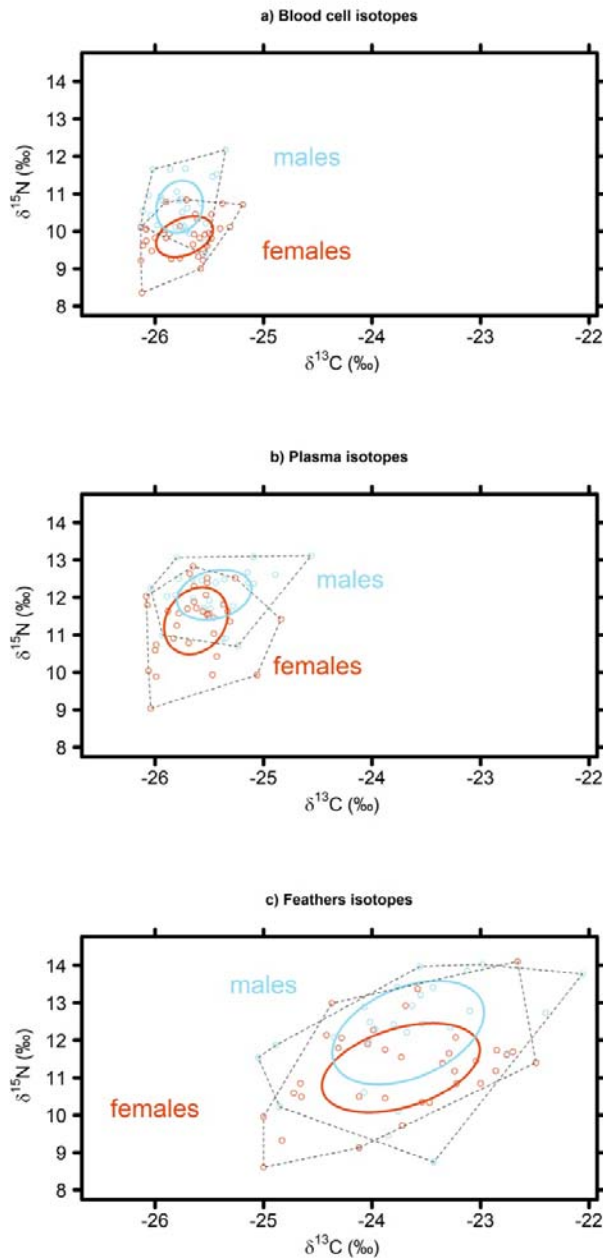

1157

1158 Figure 4. Isotopic niche area based on stable isotope values ( $\delta^{15}\text{N}$  and  $\delta^{13}\text{C}$ ) in blood cells  
1159 (top), plasma (middle) and body feathers (bottom) of male (blue) and female (red) snow  
1160 petrels breeding at Ile des Pétrels, Pointe Géologie, Antarctica during the incubation period.  
1161 The areas of the standard ellipses are represented by the solid lines, and the layman metric of  
1162 convex hull area by black dotted lines.



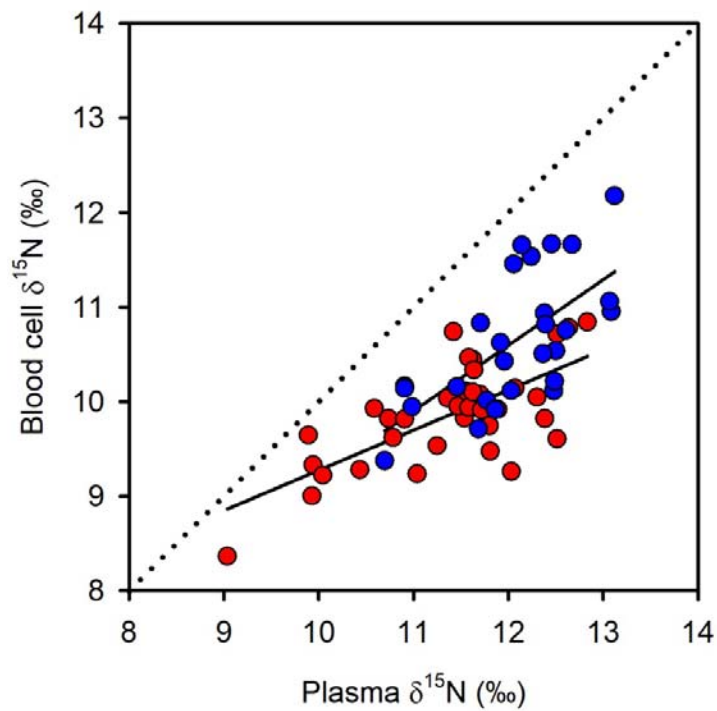

1163

1164 Figure 5. Relationships between blood cells and plasma  $\delta^{15}\text{N}$  values for male ( $n = 27$ , blue)  
1165 and female ( $n = 35$ , red) snow petrels sampled at Ile des Pétrels, Adélie Land, East Antarctica.

1166 Males:  $F_{1,22}=15.203$ ,  $P<0.001$ ,  $R^2 = 0.409$ ; females:  $F_{1,20}=24.300$ ,  $P<0.001$ ,  $R^2 = 0.549$ .

1167

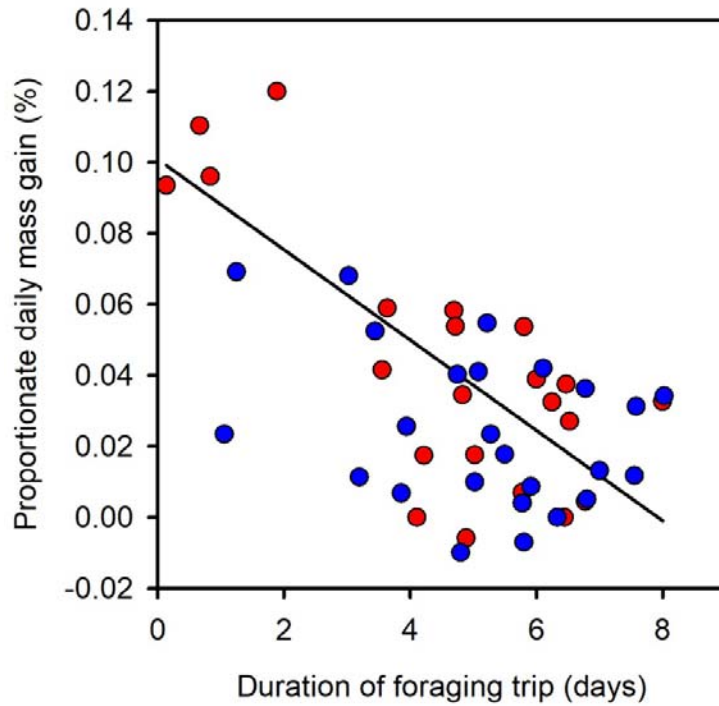

1168

1169 Figure 6. Foraging efficiency (proportionate daily mass gain while foraging) as a function of  
1170 the total duration of the foraging trip for male (blue) and female (red and solid line) snow  
1171 petrels sampled at Ile des Pétrels, Adélie Land, East Antarctica. For females:  $F_{1,20}=25.349$ ,  
1172  $P<0.001$ ,  $R^2 = 0.559$ .

1173

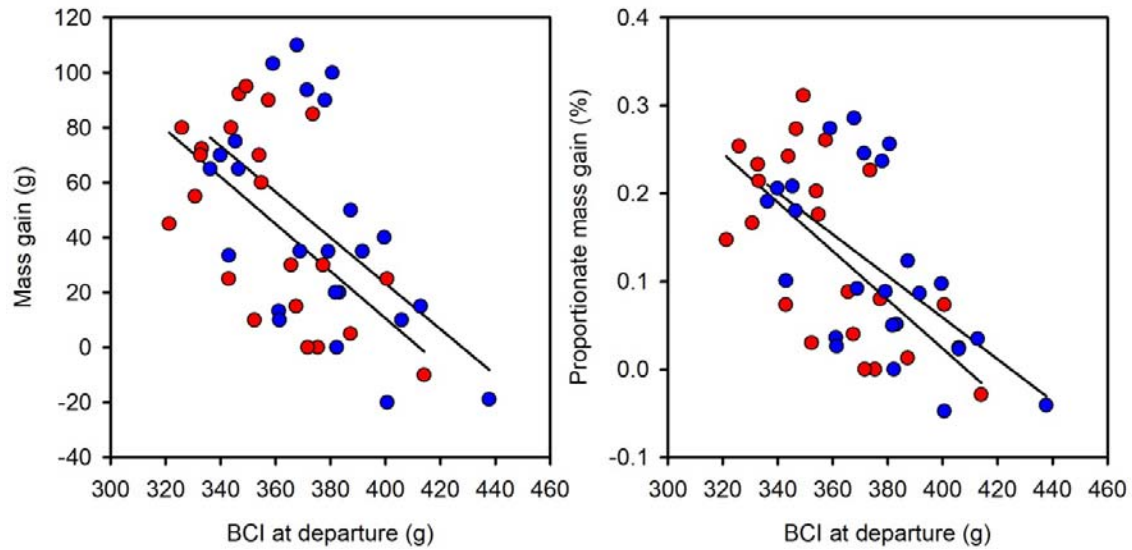

1174

1175 Figure 7. Mass gain and proportionate mass gain as a function of body condition before a  
1176 foraging trip for male (blue) and female (red) snow petrels sampled at Ile des Pétrels, Adélie  
1177 Land, East Antarctica. Male mass gain:  $F_{1,23}=10.010$ ,  $P=0.004$ ,  $r^2=0.303$ ; female mass gain:  
1178  $F_{1,20}=11.071$ ,  $P=0.003$ ,  $r^2=0.356$ ; male proportionate mass gain:  $F_{1,23}=12.361$ ,  $P=0.002$ ,  
1179  $r^2=0.350$ ; female proportionate mass gain:  $F_{1,20}=13.258$ ,  $P=0.002$ ,  $r^2=0.399$ .

1180

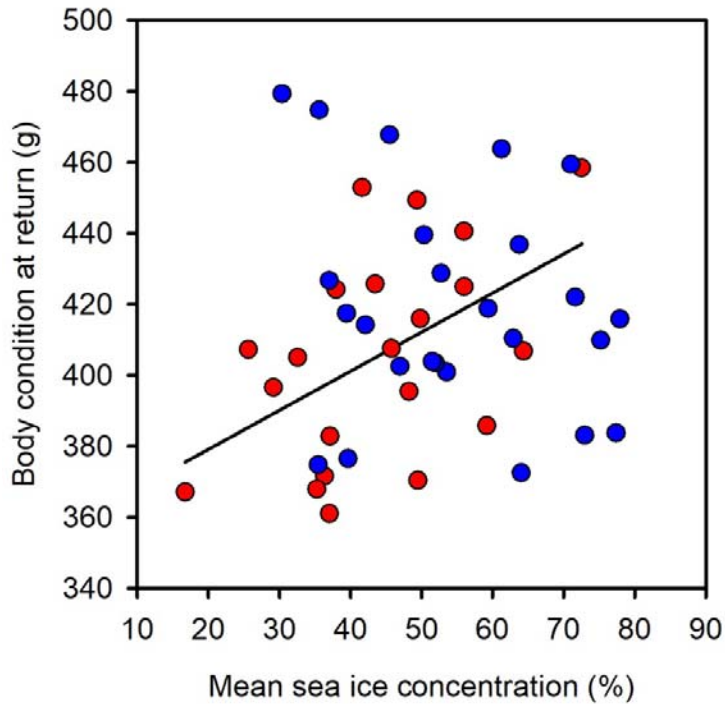

1181

1182 Figure 8. Body condition at return from a foraging trip as a function of the mean sea ice  
1183 concentration of the foraging trip locations for male (blue) and female (red and solid line)  
1184 snow petrels sampled at Ile des Pétrels, Adélie Land, East Antarctica. For females:

1185  $F_{1,19}=6.106$ ,  $P=0.023$ ,  $R^2 = 0.243$ .

1186

1187

1188

1189

1190

1191

1192

1193

1194

1195

1196 Appendix I. Testing for differences in  $\delta^{15}\text{N}$  (‰) and  $\delta^{13}\text{C}$  (‰) values between tissues for  
 1197 male and female snow petrels sampled Ile des Pétrels, Adélie Land, East Antarctica. t  
 1198 indicates Student's t-tests with df, Z indicates Wilcoxon rank test. \*\* indicates  $P < 0.01$ , \*\*\*  
 1199 indicates  $P < 0.001$  after applying the Benjamini-Hochberg procedure with a false discovery  
 1200 rate of 0.10. Values above diagonal are for  $\delta^{15}\text{N}$  (‰), values below diagonal are for  $\delta^{13}\text{C}$  (‰).  
 1201  $\delta^{15}\text{N}$  (‰) and  $\delta^{13}\text{C}$  (‰) values in feathers were corrected following Cherel et al. (2014a)  
 1202 before comparison with blood cells.  $\delta^{13}\text{C}$  (‰) values for plasma were normalized following  
 1203 Post et al. (2007) and Cherel et al. (2014b).

|               | Plasma                | Blood                 | Feather             |
|---------------|-----------------------|-----------------------|---------------------|
| <b>Male</b>   |                       |                       |                     |
| Plasma        | -                     | $t_{47}=7.206^{***}$  | $t_{47}=0.008$      |
| Blood cells   | $Z=2.743^{**}$        | -                     | $t_{47}=3.060^{**}$ |
| Feather       | $t_{47}=17.166^{***}$ | $t_{47}=29.033^{***}$ | -                   |
| <b>Female</b> |                       |                       |                     |
| Plasma        | -                     | $t_{42}=0.039$        | $t_{42}=0.435$      |
| Blood cells   | $t_{42}=0.039$        | -                     | $t_{42}=2.967^{**}$ |
| Feather       | $t_{42}=23.219^{***}$ | $Z=4.107^{***}$       | -                   |

1204
